# Supplementary material for: Carbapenemase Genotypes in Carbapenem-Resistant Enterobacterales (CRE) from Clinical Isolates in Southern Vietnam (2023): A Whole Genome Sequencing Analysis
Source: Research Square preprint supplement (doi:10.21203/rs.3.rs-6195495/v1), 2025-03-17
Supplement: Supplementary file 1 [file 02b319e3aa0f62efea13858b.xlsx]

## Sheet: Gene_data_plasmid
Final_research_code	Contig id	Start	Stop	Strand	Position of gene	plasmid_rep_type(s)	Plasmid_predicted_mobility	Gene group	Gene symbol	Sequence name	Scope	Element type	Element subtype	Class	Subclass	Method	Target length	Reference sequence length	% Coverage of reference sequence	% Identity to reference sequence	Alignment length	Accession of closest sequence	Name of closest sequence	HMM id	HMM description
ENCL_001_93021342	contig00044	7543	8352	+	plasmid_AE581	-	non-mobilizable	blaNDM	blaNDM-1	subclass B1 metallo-beta-lactamase NDM-1	core	AMR	AMR	BETA-LACTAM	CARBAPENEM	ALLELEX	270	270	100	100	270	WP_004201164.1	subclass B1 metallo-beta-lactamase NDM-1	NA	NA
ENCL_002_93028925	contig00059	6701	7510	-	plasmid_AE583	IncFII,rep_cluster_2183	mobilizable	blaNDM	blaNDM-1	subclass B1 metallo-beta-lactamase NDM-1	core	AMR	AMR	BETA-LACTAM	CARBAPENEM	ALLELEX	270	270	100	100	270	WP_004201164.1	subclass B1 metallo-beta-lactamase NDM-1	NA	NA
ENCL_003_93030217	contig00043	2284	3093	+	plasmid_AE583	IncFII,rep_cluster_2183	mobilizable	blaNDM	blaNDM-1	subclass B1 metallo-beta-lactamase NDM-1	core	AMR	AMR	BETA-LACTAM	CARBAPENEM	ALLELEX	270	270	100	100	270	WP_004201164.1	subclass B1 metallo-beta-lactamase NDM-1	NA	NA
ENCL_004_93034307	contig00389	197	1006	+	plasmid_AE583	IncFII,rep_cluster_2183	mobilizable	blaNDM	blaNDM-1	subclass B1 metallo-beta-lactamase NDM-1	core	AMR	AMR	BETA-LACTAM	CARBAPENEM	ALLELEX	270	270	100	100	270	WP_004201164.1	subclass B1 metallo-beta-lactamase NDM-1	NA	NA
ENCL_005_93039552	contig00045	1508	2317	+	plasmid_AE583	IncFII,rep_cluster_2183	mobilizable	blaNDM	blaNDM-1	subclass B1 metallo-beta-lactamase NDM-1	core	AMR	AMR	BETA-LACTAM	CARBAPENEM	ALLELEX	270	270	100	100	270	WP_004201164.1	subclass B1 metallo-beta-lactamase NDM-1	NA	NA
ENCL_006_93055710	contig00056	7543	8352	+	plasmid_AE581	-	non-mobilizable	blaNDM	blaNDM-1	subclass B1 metallo-beta-lactamase NDM-1	core	AMR	AMR	BETA-LACTAM	CARBAPENEM	ALLELEX	270	270	100	100	270	WP_004201164.1	subclass B1 metallo-beta-lactamase NDM-1	NA	NA
ENCL_007_93061852	contig00053	2750	3559	+	plasmid_AE583	IncFII,rep_cluster_2183	mobilizable	blaNDM	blaNDM-1	subclass B1 metallo-beta-lactamase NDM-1	core	AMR	AMR	BETA-LACTAM	CARBAPENEM	ALLELEX	270	270	100	100	270	WP_004201164.1	subclass B1 metallo-beta-lactamase NDM-1	NA	NA
ENCL_008_93079407	contig00063	7291	8100	-	plasmid_AE581	-	mobilizable	blaNDM	blaNDM-1	subclass B1 metallo-beta-lactamase NDM-1	core	AMR	AMR	BETA-LACTAM	CARBAPENEM	ALLELEX	270	270	100	100	270	WP_004201164.1	subclass B1 metallo-beta-lactamase NDM-1	NA	NA
ESCO_001_93008360	contig00103	2023	2817	-	plasmid_AA038	IncX3,rep_cluster_1195	conjugative	blaOXA-48-family	blaOXA-181	OXA-48 family carbapenem-hydrolyzing class D beta-lactamase OXA-181	core	AMR	AMR	BETA-LACTAM	CARBAPENEM	ALLELEX	265	265	100	100	265	WP_015060052.1	OXA-48 family carbapenem-hydrolyzing class D beta-lactamase OXA-181	NA	NA
ESCO_002_93022838	contig00076	494	1303	+	plasmid_AC288	-	non-mobilizable	blaNDM	blaNDM-5	subclass B1 metallo-beta-lactamase NDM-5	core	AMR	AMR	BETA-LACTAM	CARBAPENEM	ALLELEX	270	270	100	100	270	WP_023408309.1	subclass B1 metallo-beta-lactamase NDM-5	NA	NA
ESCO_002_93022838	contig00070	205	999	+	plasmid_AC313	rep_cluster_1195	non-mobilizable	blaOXA-48-family	blaOXA-181	OXA-48 family carbapenem-hydrolyzing class D beta-lactamase OXA-181	core	AMR	AMR	BETA-LACTAM	CARBAPENEM	ALLELEX	265	265	100	100	265	WP_015060052.1	OXA-48 family carbapenem-hydrolyzing class D beta-lactamase OXA-181	NA	NA
ESCO_003_93023101	contig00120	202	996	-	plasmid_AA977	Col156	mobilizable	blaOXA-48-family	blaOXA-48	OXA-48 family carbapenem-hydrolyzing class D beta-lactamase OXA-48	core	AMR	AMR	BETA-LACTAM	CARBAPENEM	ALLELEX	265	265	100	100	265	WP_015059991.1	OXA-48 family carbapenem-hydrolyzing class D beta-lactamase OXA-48	NA	NA
ESCO_004_93023242	contig00103	127	921	+	plasmid_AC313	rep_cluster_1195	non-mobilizable	blaOXA-48-family	blaOXA-181	OXA-48 family carbapenem-hydrolyzing class D beta-lactamase OXA-181	core	AMR	AMR	BETA-LACTAM	CARBAPENEM	ALLELEX	265	265	100	100	265	WP_015060052.1	OXA-48 family carbapenem-hydrolyzing class D beta-lactamase OXA-181	NA	NA
ESCO_005_93023649	contig00070	19368	20162	-	plasmid_AA001	-	non-mobilizable	blaOXA-48-family	blaOXA-48	OXA-48 family carbapenem-hydrolyzing class D beta-lactamase OXA-48	core	AMR	AMR	BETA-LACTAM	CARBAPENEM	ALLELEX	265	265	100	100	265	WP_015059991.1	OXA-48 family carbapenem-hydrolyzing class D beta-lactamase OXA-48	NA	NA
ESCO_006_93024642	contig00084	163	957	+	plasmid_AA977	Col156	mobilizable	blaOXA-48-family	blaOXA-48	OXA-48 family carbapenem-hydrolyzing class D beta-lactamase OXA-48	core	AMR	AMR	BETA-LACTAM	CARBAPENEM	ALLELEX	265	265	100	100	265	WP_015059991.1	OXA-48 family carbapenem-hydrolyzing class D beta-lactamase OXA-48	NA	NA
ESCO_007_93027569	contig00104	128	922	+	plasmid_AA038	IncX3,rep_cluster_1195	conjugative	blaOXA-48-family	blaOXA-181	OXA-48 family carbapenem-hydrolyzing class D beta-lactamase OXA-181	core	AMR	AMR	BETA-LACTAM	CARBAPENEM	ALLELEX	265	265	100	100	265	WP_015060052.1	OXA-48 family carbapenem-hydrolyzing class D beta-lactamase OXA-181	NA	NA
ESCO_007_93027569	contig00103	495	1304	+	plasmid_AC026	IncI-gamma/K1	non-mobilizable	blaNDM	blaNDM-5	subclass B1 metallo-beta-lactamase NDM-5	core	AMR	AMR	BETA-LACTAM	CARBAPENEM	ALLELEX	270	270	100	100	270	WP_023408309.1	subclass B1 metallo-beta-lactamase NDM-5	NA	NA
ESCO_008_93028236	contig00074	3629	4423	+	chromosome			blaOXA-48-family	blaOXA-48	OXA-48 family carbapenem-hydrolyzing class D beta-lactamase OXA-48	core	AMR	AMR	BETA-LACTAM	CARBAPENEM	ALLELEX	265	265	100	100	265	WP_015059991.1	OXA-48 family carbapenem-hydrolyzing class D beta-lactamase OXA-48	NA	NA
ESCO_009_93028357	contig00072	495	1304	+	plasmid_AE581	-	non-mobilizable	blaNDM	blaNDM-5	subclass B1 metallo-beta-lactamase NDM-5	core	AMR	AMR	BETA-LACTAM	CARBAPENEM	ALLELEX	270	270	100	100	270	WP_023408309.1	subclass B1 metallo-beta-lactamase NDM-5	NA	NA
ESCO_010_93028548	contig00073	448	1242	+	plasmid_AA038	IncX3,rep_cluster_1195	conjugative	blaOXA-48-family	blaOXA-484	OXA-48 family carbapenem-hydrolyzing class D beta-lactamase OXA-484	core	AMR	AMR	BETA-LACTAM	CARBAPENEM	ALLELEX	265	265	100	100	265	WP_063864110.1	OXA-48 family carbapenem-hydrolyzing class D beta-lactamase OXA-484	NA	NA
ESCO_011_93029309	contig00062	385	1194	+	plasmid_AA552	IncFIA,IncFII,rep_cluster_1195	non-mobilizable	blaNDM	blaNDM-5	subclass B1 metallo-beta-lactamase NDM-5	core	AMR	AMR	BETA-LACTAM	CARBAPENEM	ALLELEX	270	270	100	100	270	WP_023408309.1	subclass B1 metallo-beta-lactamase NDM-5	NA	NA
ESCO_011_93029309	contig00065	128	922	+	plasmid_AA552	IncFIA,IncFII,rep_cluster_1195	non-mobilizable	blaOXA-48-family	blaOXA-181	OXA-48 family carbapenem-hydrolyzing class D beta-lactamase OXA-181	core	AMR	AMR	BETA-LACTAM	CARBAPENEM	ALLELEX	265	265	100	100	265	WP_015060052.1	OXA-48 family carbapenem-hydrolyzing class D beta-lactamase OXA-181	NA	NA
ESCO_013_93025960	contig00081	128	922	+	plasmid_AC313	-	non-mobilizable	blaOXA-48-family	blaOXA-181	OXA-48 family carbapenem-hydrolyzing class D beta-lactamase OXA-181	core	AMR	AMR	BETA-LACTAM	CARBAPENEM	ALLELEX	265	265	100	100	265	WP_015060052.1	OXA-48 family carbapenem-hydrolyzing class D beta-lactamase OXA-181	NA	NA
ESCO_014_93030309	contig00076	495	1304	+	plasmid_AA173	IncFIA,IncFIA,IncFIB,rep_cluster_2131	non-mobilizable	blaNDM	blaNDM-5	subclass B1 metallo-beta-lactamase NDM-5	core	AMR	AMR	BETA-LACTAM	CARBAPENEM	ALLELEX	270	270	100	100	270	WP_023408309.1	subclass B1 metallo-beta-lactamase NDM-5	NA	NA
ESCO_015_93029726	contig00074	163	957	+	plasmid_AA977	Col156	mobilizable	blaOXA-48-family	blaOXA-48	OXA-48 family carbapenem-hydrolyzing class D beta-lactamase OXA-48	core	AMR	AMR	BETA-LACTAM	CARBAPENEM	ALLELEX	265	265	100	100	265	WP_015059991.1	OXA-48 family carbapenem-hydrolyzing class D beta-lactamase OXA-48	NA	NA
ESCO_018_93034764	contig00128	128	922	+	plasmid_AA038	IncX3,rep_cluster_1195	conjugative	blaOXA-48-family	blaOXA-484	OXA-48 family carbapenem-hydrolyzing class D beta-lactamase OXA-484	core	AMR	AMR	BETA-LACTAM	CARBAPENEM	ALLELEX	265	265	100	100	265	WP_063864110.1	OXA-48 family carbapenem-hydrolyzing class D beta-lactamase OXA-484	NA	NA
ESCO_020_93036498	contig00073	5326	6120	-	plasmid_AA038	IncX3,rep_cluster_1195	conjugative	blaOXA-48-family	blaOXA-181	OXA-48 family carbapenem-hydrolyzing class D beta-lactamase OXA-181	core	AMR	AMR	BETA-LACTAM	CARBAPENEM	ALLELEX	265	265	100	100	265	WP_015060052.1	OXA-48 family carbapenem-hydrolyzing class D beta-lactamase OXA-181	NA	NA
ESCO_021_93035243	contig00063	128	922	+	plasmid_AA038	IncX3,rep_cluster_1195	conjugative	blaOXA-48-family	blaOXA-181	OXA-48 family carbapenem-hydrolyzing class D beta-lactamase OXA-181	core	AMR	AMR	BETA-LACTAM	CARBAPENEM	ALLELEX	265	265	100	100	265	WP_015060052.1	OXA-48 family carbapenem-hydrolyzing class D beta-lactamase OXA-181	NA	NA
ESCO_021_93035243	contig00061	493	1302	+	plasmid_AA172	IncFII	non-mobilizable	blaNDM	blaNDM-5	subclass B1 metallo-beta-lactamase NDM-5	core	AMR	AMR	BETA-LACTAM	CARBAPENEM	ALLELEX	270	270	100	100	270	WP_023408309.1	subclass B1 metallo-beta-lactamase NDM-5	NA	NA
ESCO_022_93041196	contig00073	495	1304	+	plasmid_AA283	IncK2/Z	conjugative	blaNDM	blaNDM-5	subclass B1 metallo-beta-lactamase NDM-5	core	AMR	AMR	BETA-LACTAM	CARBAPENEM	ALLELEX	270	270	100	100	270	WP_023408309.1	subclass B1 metallo-beta-lactamase NDM-5	NA	NA
ESCO_023_93040590	contig00106	128	922	+	plasmid_AC313	rep_cluster_1195	non-mobilizable	blaOXA-48-family	blaOXA-181	OXA-48 family carbapenem-hydrolyzing class D beta-lactamase OXA-181	core	AMR	AMR	BETA-LACTAM	CARBAPENEM	ALLELEX	265	265	100	100	265	WP_015060052.1	OXA-48 family carbapenem-hydrolyzing class D beta-lactamase OXA-181	NA	NA
ESCO_024_93041033	contig00080	483	1292	+	plasmid_AE581	-	non-mobilizable	blaNDM	blaNDM-5	subclass B1 metallo-beta-lactamase NDM-5	core	AMR	AMR	BETA-LACTAM	CARBAPENEM	ALLELEX	270	270	100	100	270	WP_023408309.1	subclass B1 metallo-beta-lactamase NDM-5	NA	NA
ESCO_025_93041644	contig00149	494	1303	+	plasmid_AA322	IncFIA,IncFIB,IncFIC	conjugative	blaNDM	blaNDM-5	subclass B1 metallo-beta-lactamase NDM-5	core	AMR	AMR	BETA-LACTAM	CARBAPENEM	ALLELEX	270	270	100	100	270	WP_023408309.1	subclass B1 metallo-beta-lactamase NDM-5	NA	NA
ESCO_026_93038770	contig00103	493	1302	+	plasmid_AA324	IncFIA,IncFIB	conjugative	blaNDM	blaNDM-5	subclass B1 metallo-beta-lactamase NDM-5	core	AMR	AMR	BETA-LACTAM	CARBAPENEM	ALLELEX	270	270	100	100	270	WP_023408309.1	subclass B1 metallo-beta-lactamase NDM-5	NA	NA
ESCO_027_93043073	contig00067	2247	3041	+	chromosome			blaOXA-48-family	blaOXA-48	OXA-48 family carbapenem-hydrolyzing class D beta-lactamase OXA-48	core	AMR	AMR	BETA-LACTAM	CARBAPENEM	ALLELEX	265	265	100	100	265	WP_015059991.1	OXA-48 family carbapenem-hydrolyzing class D beta-lactamase OXA-48	NA	NA
ESCO_028_93044470	contig00080	128	922	+	plasmid_AA739	IncHI2A,rep_cluster_1088,rep_cluster_1195	conjugative	blaOXA-48-family	blaOXA-181	OXA-48 family carbapenem-hydrolyzing class D beta-lactamase OXA-181	core	AMR	AMR	BETA-LACTAM	CARBAPENEM	ALLELEX	265	265	100	100	265	WP_015060052.1	OXA-48 family carbapenem-hydrolyzing class D beta-lactamase OXA-181	NA	NA
ESCO_028_93044470	contig00154	2	478	+	plasmid_AA739	IncHI2A,rep_cluster_1088,rep_cluster_1195	conjugative	blaNDM	blaNDM	NDM family subclass B1 metallo-beta-lactamase	core	AMR	AMR	BETA-LACTAM	CARBAPENEM	PARTIAL_CONTIG_ENDX	159	270	58.89	100	159	WP_023408309.1	subclass B1 metallo-beta-lactamase NDM-5	NA	NA
ESCO_029_93045262	contig00092	388	1197	+	plasmid_AA378	IncHI1B	non-mobilizable	blaNDM	blaNDM-5	subclass B1 metallo-beta-lactamase NDM-5	core	AMR	AMR	BETA-LACTAM	CARBAPENEM	ALLELEX	270	270	100	100	270	WP_023408309.1	subclass B1 metallo-beta-lactamase NDM-5	NA	NA
ESCO_031_93047437	contig00075	495	1304	+	plasmid_AE581	-	non-mobilizable	blaNDM	blaNDM-5	subclass B1 metallo-beta-lactamase NDM-5	core	AMR	AMR	BETA-LACTAM	CARBAPENEM	ALLELEX	270	270	100	100	270	WP_023408309.1	subclass B1 metallo-beta-lactamase NDM-5	NA	NA
ESCO_032_93050872	contig00072	128	922	+	plasmid_AC313	rep_cluster_1195	non-mobilizable	blaOXA-48-family	blaOXA-181	OXA-48 family carbapenem-hydrolyzing class D beta-lactamase OXA-181	core	AMR	AMR	BETA-LACTAM	CARBAPENEM	ALLELEX	265	265	100	100	265	WP_015060052.1	OXA-48 family carbapenem-hydrolyzing class D beta-lactamase OXA-181	NA	NA
ESCO_033_93053533	contig00106	127	921	+	plasmid_AC313	rep_cluster_1195	non-mobilizable	blaOXA-48-family	blaOXA-181	OXA-48 family carbapenem-hydrolyzing class D beta-lactamase OXA-181	core	AMR	AMR	BETA-LACTAM	CARBAPENEM	ALLELEX	265	265	100	100	265	WP_015060052.1	OXA-48 family carbapenem-hydrolyzing class D beta-lactamase OXA-181	NA	NA
ESCO_034_93050038	contig00111	128	922	+	plasmid_AC313	rep_cluster_1195	non-mobilizable	blaOXA-48-family	blaOXA-181	OXA-48 family carbapenem-hydrolyzing class D beta-lactamase OXA-181	core	AMR	AMR	BETA-LACTAM	CARBAPENEM	ALLELEX	265	265	100	100	265	WP_015060052.1	OXA-48 family carbapenem-hydrolyzing class D beta-lactamase OXA-181	NA	NA
KLPN_001_93008594	contig00064	4060	4854	+	plasmid_AA038	IncX3,rep_cluster_1195	conjugative	blaOXA-48-family	blaOXA-181	OXA-48 family carbapenem-hydrolyzing class D beta-lactamase OXA-181	core	AMR	AMR	BETA-LACTAM	CARBAPENEM	ALLELEX	265	265	100	100	265	WP_015060052.1	OXA-48 family carbapenem-hydrolyzing class D beta-lactamase OXA-181	NA	NA
KLPN_001_93008594	contig00079	224	1033	+	plasmid_AE583	IncFII,rep_cluster_2183	mobilizable	blaNDM	blaNDM-4	subclass B1 metallo-beta-lactamase NDM-4	core	AMR	AMR	BETA-LACTAM	CARBAPENEM	ALLELEX	270	270	100	100	270	WP_063860861.1	subclass B1 metallo-beta-lactamase NDM-4	NA	NA
KLPN_002_93016208	contig00070	128	922	+	plasmid_AA449	IncFII,rep_cluster_1195,rep_cluster_1418,rep_cluster_2183	conjugative	blaOXA-48-family	blaOXA-181	OXA-48 family carbapenem-hydrolyzing class D beta-lactamase OXA-181	core	AMR	AMR	BETA-LACTAM	CARBAPENEM	ALLELEX	265	265	100	100	265	WP_015060052.1	OXA-48 family carbapenem-hydrolyzing class D beta-lactamase OXA-181	NA	NA
KLPN_003_93010056	contig00093	225	1034	+	plasmid_AA449	IncFII,rep_cluster_1195,rep_cluster_1418,rep_cluster_2183	conjugative	blaNDM	blaNDM-4	subclass B1 metallo-beta-lactamase NDM-4	core	AMR	AMR	BETA-LACTAM	CARBAPENEM	ALLELEX	270	270	100	100	270	WP_063860861.1	subclass B1 metallo-beta-lactamase NDM-4	NA	NA
KLPN_003_93010056	contig00076	2282	3076	+	plasmid_AA977	Col156	mobilizable	blaOXA-48-family	blaOXA-48	OXA-48 family carbapenem-hydrolyzing class D beta-lactamase OXA-48	core	AMR	AMR	BETA-LACTAM	CARBAPENEM	ALLELEX	265	265	100	100	265	WP_015059991.1	OXA-48 family carbapenem-hydrolyzing class D beta-lactamase OXA-48	NA	NA
KLPN_004_93018760	contig00091	225	1034	+	plasmid_AA449	IncFII,rep_cluster_1195,rep_cluster_1418,rep_cluster_2183	conjugative	blaNDM	blaNDM-4	subclass B1 metallo-beta-lactamase NDM-4	core	AMR	AMR	BETA-LACTAM	CARBAPENEM	ALLELEX	270	270	100	100	270	WP_063860861.1	subclass B1 metallo-beta-lactamase NDM-4	NA	NA
KLPN_004_93018760	contig00076	2282	3076	+	plasmid_AA977	Col156	mobilizable	blaOXA-48-family	blaOXA-48	OXA-48 family carbapenem-hydrolyzing class D beta-lactamase OXA-48	core	AMR	AMR	BETA-LACTAM	CARBAPENEM	ALLELEX	265	265	100	100	265	WP_015059991.1	OXA-48 family carbapenem-hydrolyzing class D beta-lactamase OXA-48	NA	NA
KLPN_005_93022583	contig00089	408	1286	+	plasmid_AA359	IncU	non-mobilizable	blaKPC	blaKPC-2	carbapenem-hydrolyzing class A beta-lactamase KPC-2	core	AMR	AMR	BETA-LACTAM	CARBAPENEM	ALLELEX	293	293	100	100	293	WP_004199234.1	carbapenem-hydrolyzing class A beta-lactamase KPC-2	NA	NA
KLPN_006_93022848	contig00072	922	1716	+	plasmid_AA038	IncX3,rep_cluster_1195	conjugative	blaOXA-48-family	blaOXA-181	OXA-48 family carbapenem-hydrolyzing class D beta-lactamase OXA-181	core	AMR	AMR	BETA-LACTAM	CARBAPENEM	ALLELEX	265	265	100	100	265	WP_015060052.1	OXA-48 family carbapenem-hydrolyzing class D beta-lactamase OXA-181	NA	NA
KLPN_006_93022848	contig00068	6701	7510	-	plasmid_AC125	IncFIB	non-mobilizable	blaNDM	blaNDM-4	subclass B1 metallo-beta-lactamase NDM-4	core	AMR	AMR	BETA-LACTAM	CARBAPENEM	ALLELEX	270	270	100	100	270	WP_063860861.1	subclass B1 metallo-beta-lactamase NDM-4	NA	NA
KLPN_007_93023074	contig00107	1834	2628	-	plasmid_AA038	IncFII,IncX3,rep_cluster_1195,rep_cluster_2183	conjugative	blaOXA-48-family	blaOXA-181	OXA-48 family carbapenem-hydrolyzing class D beta-lactamase OXA-181	core	AMR	AMR	BETA-LACTAM	CARBAPENEM	ALLELEX	265	265	100	100	265	WP_015060052.1	OXA-48 family carbapenem-hydrolyzing class D beta-lactamase OXA-181	NA	NA
KLPN_007_93023074	contig00089	2019	2897	+	plasmid_AA359	-	non-mobilizable	blaKPC	blaKPC-2	carbapenem-hydrolyzing class A beta-lactamase KPC-2	core	AMR	AMR	BETA-LACTAM	CARBAPENEM	ALLELEX	293	293	100	100	293	WP_004199234.1	carbapenem-hydrolyzing class A beta-lactamase KPC-2	NA	NA
KLPN_008_93023212	contig00071	4058	4852	+	plasmid_AA038	IncX3,rep_cluster_1195	conjugative	blaOXA-48-family	blaOXA-181	OXA-48 family carbapenem-hydrolyzing class D beta-lactamase OXA-181	core	AMR	AMR	BETA-LACTAM	CARBAPENEM	ALLELEX	265	265	100	100	265	WP_015060052.1	OXA-48 family carbapenem-hydrolyzing class D beta-lactamase OXA-181	NA	NA
KLPN_008_93023212	contig00086	6701	7498	-	plasmid_AE583	IncFII	mobilizable	blaNDM	blaNDM	NDM family subclass B1 metallo-beta-lactamase	core	AMR	AMR	BETA-LACTAM	CARBAPENEM	BLASTX	266	270	98.52	100	266	WP_063860861.1	subclass B1 metallo-beta-lactamase NDM-4	NA	NA
KLPN_009_93023243	contig00064	128	922	+	plasmid_AA038	IncX3,rep_cluster_1195	conjugative	blaOXA-48-family	blaOXA-181	OXA-48 family carbapenem-hydrolyzing class D beta-lactamase OXA-181	core	AMR	AMR	BETA-LACTAM	CARBAPENEM	ALLELEX	265	265	100	100	265	WP_015060052.1	OXA-48 family carbapenem-hydrolyzing class D beta-lactamase OXA-181	NA	NA
KLPN_009_93023243	contig00066	6699	7508	-	plasmid_AC125	IncFIB	non-mobilizable	blaNDM	blaNDM-4	subclass B1 metallo-beta-lactamase NDM-4	core	AMR	AMR	BETA-LACTAM	CARBAPENEM	ALLELEX	270	270	100	100	270	WP_063860861.1	subclass B1 metallo-beta-lactamase NDM-4	NA	NA
KLPN_010_93021441	contig00071	128	922	+	plasmid_AA449	IncFII,rep_cluster_1195,rep_cluster_1418,rep_cluster_2183	conjugative	blaOXA-48-family	blaOXA-181	OXA-48 family carbapenem-hydrolyzing class D beta-lactamase OXA-181	core	AMR	AMR	BETA-LACTAM	CARBAPENEM	ALLELEX	265	265	100	100	265	WP_015060052.1	OXA-48 family carbapenem-hydrolyzing class D beta-lactamase OXA-181	NA	NA
KLPN_010_93021441	contig00085	225	1034	+	plasmid_AA449	IncFII,rep_cluster_1195,rep_cluster_1418,rep_cluster_2183	conjugative	blaNDM	blaNDM-4	subclass B1 metallo-beta-lactamase NDM-4	core	AMR	AMR	BETA-LACTAM	CARBAPENEM	ALLELEX	270	270	100	100	270	WP_063860861.1	subclass B1 metallo-beta-lactamase NDM-4	NA	NA
KLPN_011_93024520	contig00066	4048	4842	+	plasmid_AA038	IncX3,rep_cluster_1195	conjugative	blaOXA-48-family	blaOXA-181	OXA-48 family carbapenem-hydrolyzing class D beta-lactamase OXA-181	core	AMR	AMR	BETA-LACTAM	CARBAPENEM	ALLELEX	265	265	100	100	265	WP_015060052.1	OXA-48 family carbapenem-hydrolyzing class D beta-lactamase OXA-181	NA	NA
KLPN_011_93024520	contig00078	6701	7510	-	plasmid_AE583	IncFII,rep_cluster_2183	mobilizable	blaNDM	blaNDM-4	subclass B1 metallo-beta-lactamase NDM-4	core	AMR	AMR	BETA-LACTAM	CARBAPENEM	ALLELEX	270	270	100	100	270	WP_063860861.1	subclass B1 metallo-beta-lactamase NDM-4	NA	NA
KLPN_012_93025496	contig00065	128	922	+	plasmid_AA038	IncX3,rep_cluster_1195	conjugative	blaOXA-48-family	blaOXA-181	OXA-48 family carbapenem-hydrolyzing class D beta-lactamase OXA-181	core	AMR	AMR	BETA-LACTAM	CARBAPENEM	ALLELEX	265	265	100	100	265	WP_015060052.1	OXA-48 family carbapenem-hydrolyzing class D beta-lactamase OXA-181	NA	NA
KLPN_012_93025496	contig00077	225	1034	+	plasmid_AA449	IncFII,rep_cluster_1418,rep_cluster_2183	conjugative	blaNDM	blaNDM-4	subclass B1 metallo-beta-lactamase NDM-4	core	AMR	AMR	BETA-LACTAM	CARBAPENEM	ALLELEX	270	270	100	100	270	WP_063860861.1	subclass B1 metallo-beta-lactamase NDM-4	NA	NA
KLPN_013_93025277	contig00068	4058	4852	+	plasmid_AA038	IncX3,rep_cluster_1195	conjugative	blaOXA-48-family	blaOXA-181	OXA-48 family carbapenem-hydrolyzing class D beta-lactamase OXA-181	core	AMR	AMR	BETA-LACTAM	CARBAPENEM	ALLELEX	265	265	100	100	265	WP_015060052.1	OXA-48 family carbapenem-hydrolyzing class D beta-lactamase OXA-181	NA	NA
KLPN_013_93025277	contig00099	225	1034	+	plasmid_AE583	IncFII,rep_cluster_2183	mobilizable	blaNDM	blaNDM-4	subclass B1 metallo-beta-lactamase NDM-4	core	AMR	AMR	BETA-LACTAM	CARBAPENEM	ALLELEX	270	270	100	100	270	WP_063860861.1	subclass B1 metallo-beta-lactamase NDM-4	NA	NA
KLPN_014_93025765	contig00087	162	971	+	plasmid_AA038	IncX3	conjugative	blaNDM	blaNDM-5	subclass B1 metallo-beta-lactamase NDM-5	core	AMR	AMR	BETA-LACTAM	CARBAPENEM	ALLELEX	270	270	100	100	270	WP_023408309.1	subclass B1 metallo-beta-lactamase NDM-5	NA	NA
KLPN_015_93026130	contig00069	128	922	+	plasmid_AA038	IncX3,rep_cluster_1195	conjugative	blaOXA-48-family	blaOXA-181	OXA-48 family carbapenem-hydrolyzing class D beta-lactamase OXA-181	core	AMR	AMR	BETA-LACTAM	CARBAPENEM	ALLELEX	265	265	100	100	265	WP_015060052.1	OXA-48 family carbapenem-hydrolyzing class D beta-lactamase OXA-181	NA	NA
KLPN_015_93026130	contig00084	225	1034	+	plasmid_AA449	IncFII,rep_cluster_1418,rep_cluster_2183	conjugative	blaNDM	blaNDM-4	subclass B1 metallo-beta-lactamase NDM-4	core	AMR	AMR	BETA-LACTAM	CARBAPENEM	ALLELEX	270	270	100	100	270	WP_063860861.1	subclass B1 metallo-beta-lactamase NDM-4	NA	NA
KLPN_016_93026150	contig00085	4048	4842	+	plasmid_AA038	ColKP3,IncX3	conjugative	blaOXA-48-family	blaOXA-181	OXA-48 family carbapenem-hydrolyzing class D beta-lactamase OXA-181	core	AMR	AMR	BETA-LACTAM	CARBAPENEM	ALLELEX	265	265	100	100	265	WP_015060052.1	OXA-48 family carbapenem-hydrolyzing class D beta-lactamase OXA-181	NA	NA
KLPN_016_93026150	contig00125	225	1034	+	plasmid_AE583	IncFII,rep_cluster_2183	mobilizable	blaNDM	blaNDM-4	subclass B1 metallo-beta-lactamase NDM-4	core	AMR	AMR	BETA-LACTAM	CARBAPENEM	ALLELEX	270	270	100	100	270	WP_063860861.1	subclass B1 metallo-beta-lactamase NDM-4	NA	NA
KLPN_017_93026300	contig00058	6701	7510	-	plasmid_AA450	IncFII,rep_cluster_1418,rep_cluster_2183	conjugative	blaNDM	blaNDM-4	subclass B1 metallo-beta-lactamase NDM-4	core	AMR	AMR	BETA-LACTAM	CARBAPENEM	ALLELEX	270	270	100	100	270	WP_063860861.1	subclass B1 metallo-beta-lactamase NDM-4	NA	NA
KLPN_018_93026436	contig00065	128	922	+	plasmid_AA038	IncX3,rep_cluster_1195	conjugative	blaOXA-48-family	blaOXA-181	OXA-48 family carbapenem-hydrolyzing class D beta-lactamase OXA-181	core	AMR	AMR	BETA-LACTAM	CARBAPENEM	ALLELEX	265	265	100	100	265	WP_015060052.1	OXA-48 family carbapenem-hydrolyzing class D beta-lactamase OXA-181	NA	NA
KLPN_018_93026436	contig00081	226	1035	+	plasmid_AA449	IncFII,rep_cluster_1418,rep_cluster_2183	conjugative	blaNDM	blaNDM-4	subclass B1 metallo-beta-lactamase NDM-4	core	AMR	AMR	BETA-LACTAM	CARBAPENEM	ALLELEX	270	270	100	100	270	WP_063860861.1	subclass B1 metallo-beta-lactamase NDM-4	NA	NA
KLPN_019_93026140	contig00099	1631	2425	-	plasmid_AA038	IncX3	conjugative	blaOXA-48-family	blaOXA-181	OXA-48 family carbapenem-hydrolyzing class D beta-lactamase OXA-181	core	AMR	AMR	BETA-LACTAM	CARBAPENEM	ALLELEX	265	265	100	100	265	WP_015060052.1	OXA-48 family carbapenem-hydrolyzing class D beta-lactamase OXA-181	NA	NA
KLPN_020_93026402	contig00090	1365	2243	+	plasmid_AA275	IncFIB,IncR	conjugative	blaKPC	blaKPC-2	carbapenem-hydrolyzing class A beta-lactamase KPC-2	core	AMR	AMR	BETA-LACTAM	CARBAPENEM	ALLELEX	293	293	100	100	293	WP_004199234.1	carbapenem-hydrolyzing class A beta-lactamase KPC-2	NA	NA
KLPN_021_93026496	contig00066	128	922	+	plasmid_AA038	IncX3,rep_cluster_1195	conjugative	blaOXA-48-family	blaOXA-181	OXA-48 family carbapenem-hydrolyzing class D beta-lactamase OXA-181	core	AMR	AMR	BETA-LACTAM	CARBAPENEM	ALLELEX	265	265	100	100	265	WP_015060052.1	OXA-48 family carbapenem-hydrolyzing class D beta-lactamase OXA-181	NA	NA
KLPN_021_93026496	contig00074	6699	7508	-	plasmid_AC125	IncFIB	non-mobilizable	blaNDM	blaNDM-4	subclass B1 metallo-beta-lactamase NDM-4	core	AMR	AMR	BETA-LACTAM	CARBAPENEM	ALLELEX	270	270	100	100	270	WP_063860861.1	subclass B1 metallo-beta-lactamase NDM-4	NA	NA
KLPN_022_93026626	contig00085	4563	5441	+	plasmid_AA275	IncFIB,IncR	conjugative	blaKPC	blaKPC-2	carbapenem-hydrolyzing class A beta-lactamase KPC-2	core	AMR	AMR	BETA-LACTAM	CARBAPENEM	ALLELEX	293	293	100	100	293	WP_004199234.1	carbapenem-hydrolyzing class A beta-lactamase KPC-2	NA	NA
KLPN_023_93026715	contig00089	138	1016	+	plasmid_AA359	IncU	non-mobilizable	blaKPC	blaKPC-2	carbapenem-hydrolyzing class A beta-lactamase KPC-2	core	AMR	AMR	BETA-LACTAM	CARBAPENEM	ALLELEX	293	293	100	100	293	WP_004199234.1	carbapenem-hydrolyzing class A beta-lactamase KPC-2	NA	NA
KLPN_024_93026486	contig00087	2019	2897	+	plasmid_AA359	IncU	non-mobilizable	blaKPC	blaKPC-2	carbapenem-hydrolyzing class A beta-lactamase KPC-2	core	AMR	AMR	BETA-LACTAM	CARBAPENEM	ALLELEX	293	293	100	100	293	WP_004199234.1	carbapenem-hydrolyzing class A beta-lactamase KPC-2	NA	NA
KLPN_025_93027404	contig00095	3925	4803	+	plasmid_AA359	IncU	non-mobilizable	blaKPC	blaKPC-2	carbapenem-hydrolyzing class A beta-lactamase KPC-2	core	AMR	AMR	BETA-LACTAM	CARBAPENEM	ALLELEX	293	293	100	100	293	WP_004199234.1	carbapenem-hydrolyzing class A beta-lactamase KPC-2	NA	NA
KLPN_026_93027452	contig00089	138	1016	+	plasmid_AA359	IncU	non-mobilizable	blaKPC	blaKPC-2	carbapenem-hydrolyzing class A beta-lactamase KPC-2	core	AMR	AMR	BETA-LACTAM	CARBAPENEM	ALLELEX	293	293	100	100	293	WP_004199234.1	carbapenem-hydrolyzing class A beta-lactamase KPC-2	NA	NA
KLPN_027_93027820	contig00088	4061	4855	+	plasmid_AA038	IncX3,rep_cluster_1195	conjugative	blaOXA-48-family	blaOXA-181	OXA-48 family carbapenem-hydrolyzing class D beta-lactamase OXA-181	core	AMR	AMR	BETA-LACTAM	CARBAPENEM	ALLELEX	265	265	100	100	265	WP_015060052.1	OXA-48 family carbapenem-hydrolyzing class D beta-lactamase OXA-181	NA	NA
KLPN_027_93027820	contig00102	225	1034	+	plasmid_AE583	IncFII,rep_cluster_2183	mobilizable	blaNDM	blaNDM-4	subclass B1 metallo-beta-lactamase NDM-4	core	AMR	AMR	BETA-LACTAM	CARBAPENEM	ALLELEX	270	270	100	100	270	WP_063860861.1	subclass B1 metallo-beta-lactamase NDM-4	NA	NA
KLPN_028_93028497	contig00072	6702	7511	-	chromosome			blaNDM	blaNDM-4	subclass B1 metallo-beta-lactamase NDM-4	core	AMR	AMR	BETA-LACTAM	CARBAPENEM	ALLELEX	270	270	100	100	270	WP_063860861.1	subclass B1 metallo-beta-lactamase NDM-4	NA	NA
KLPN_029_93028623	contig00074	6702	7511	-	plasmid_AA450	IncFII,rep_cluster_1418,rep_cluster_2183	conjugative	blaNDM	blaNDM-4	subclass B1 metallo-beta-lactamase NDM-4	core	AMR	AMR	BETA-LACTAM	CARBAPENEM	ALLELEX	270	270	100	100	270	WP_063860861.1	subclass B1 metallo-beta-lactamase NDM-4	NA	NA
KLPN_029_93028623	contig00073	2282	3076	+	plasmid_AA977	Col156	mobilizable	blaOXA-48-family	blaOXA-48	OXA-48 family carbapenem-hydrolyzing class D beta-lactamase OXA-48	core	AMR	AMR	BETA-LACTAM	CARBAPENEM	ALLELEX	265	265	100	100	265	WP_015059991.1	OXA-48 family carbapenem-hydrolyzing class D beta-lactamase OXA-48	NA	NA
KLPN_030_93028768	contig00084	2019	2897	+	plasmid_AA359	IncU	non-mobilizable	blaKPC	blaKPC-2	carbapenem-hydrolyzing class A beta-lactamase KPC-2	core	AMR	AMR	BETA-LACTAM	CARBAPENEM	ALLELEX	293	293	100	100	293	WP_004199234.1	carbapenem-hydrolyzing class A beta-lactamase KPC-2	NA	NA
KLPN_032_93029239	contig00066	128	922	+	plasmid_AA449	IncFII,rep_cluster_1195,rep_cluster_1418,rep_cluster_2183	conjugative	blaOXA-48-family	blaOXA-181	OXA-48 family carbapenem-hydrolyzing class D beta-lactamase OXA-181	core	AMR	AMR	BETA-LACTAM	CARBAPENEM	ALLELEX	265	265	100	100	265	WP_015060052.1	OXA-48 family carbapenem-hydrolyzing class D beta-lactamase OXA-181	NA	NA
KLPN_033_93029369	contig00070	4061	4855	+	plasmid_AA038	IncX3,rep_cluster_1195	conjugative	blaOXA-48-family	blaOXA-181	OXA-48 family carbapenem-hydrolyzing class D beta-lactamase OXA-181	core	AMR	AMR	BETA-LACTAM	CARBAPENEM	ALLELEX	265	265	100	100	265	WP_015060052.1	OXA-48 family carbapenem-hydrolyzing class D beta-lactamase OXA-181	NA	NA
KLPN_033_93029369	contig00083	6701	7510	-	plasmid_AE583	IncFII,rep_cluster_2183	mobilizable	blaNDM	blaNDM-4	subclass B1 metallo-beta-lactamase NDM-4	core	AMR	AMR	BETA-LACTAM	CARBAPENEM	ALLELEX	270	270	100	100	270	WP_063860861.1	subclass B1 metallo-beta-lactamase NDM-4	NA	NA
KLPN_034_93028116	contig00078	6701	7510	-	plasmid_AA450	IncFII,IncFII,rep_cluster_1418,rep_cluster_2183	conjugative	blaNDM	blaNDM-4	subclass B1 metallo-beta-lactamase NDM-4	core	AMR	AMR	BETA-LACTAM	CARBAPENEM	ALLELEX	270	270	100	100	270	WP_063860861.1	subclass B1 metallo-beta-lactamase NDM-4	NA	NA
KLPN_035_93029057	contig00093	1435	2229	-	plasmid_AA002	ColRNAI_rep_cluster_1987,IncL/M	conjugative	blaOXA-48-family	blaOXA-48	OXA-48 family carbapenem-hydrolyzing class D beta-lactamase OXA-48	core	AMR	AMR	BETA-LACTAM	CARBAPENEM	ALLELEX	265	265	100	100	265	WP_015059991.1	OXA-48 family carbapenem-hydrolyzing class D beta-lactamase OXA-48	NA	NA
KLPN_036_93029797	contig00650	3	800	+	chromosome			blaNDM	blaNDM	NDM family subclass B1 metallo-beta-lactamase	core	AMR	AMR	BETA-LACTAM	CARBAPENEM	BLASTX	266	270	98.52	100	266	WP_063860861.1	subclass B1 metallo-beta-lactamase NDM-4	NA	NA
KLPN_037_93030059	contig00064	4061	4855	+	plasmid_AA038	IncX3,rep_cluster_1195	conjugative	blaOXA-48-family	blaOXA-181	OXA-48 family carbapenem-hydrolyzing class D beta-lactamase OXA-181	core	AMR	AMR	BETA-LACTAM	CARBAPENEM	ALLELEX	265	265	100	100	265	WP_015060052.1	OXA-48 family carbapenem-hydrolyzing class D beta-lactamase OXA-181	NA	NA
KLPN_037_93030059	contig00073	6701	7510	-	plasmid_AE583	IncFII,rep_cluster_2183	mobilizable	blaNDM	blaNDM-4	subclass B1 metallo-beta-lactamase NDM-4	core	AMR	AMR	BETA-LACTAM	CARBAPENEM	ALLELEX	270	270	100	100	270	WP_063860861.1	subclass B1 metallo-beta-lactamase NDM-4	NA	NA
KLPN_038_93030026	contig00086	4563	5441	+	plasmid_AA275	IncFIB,IncR	conjugative	blaKPC	blaKPC-2	carbapenem-hydrolyzing class A beta-lactamase KPC-2	core	AMR	AMR	BETA-LACTAM	CARBAPENEM	ALLELEX	293	293	100	100	293	WP_004199234.1	carbapenem-hydrolyzing class A beta-lactamase KPC-2	NA	NA
KLPN_039_93030110	contig00087	2019	2897	+	plasmid_AA359	IncU	non-mobilizable	blaKPC	blaKPC-2	carbapenem-hydrolyzing class A beta-lactamase KPC-2	core	AMR	AMR	BETA-LACTAM	CARBAPENEM	ALLELEX	293	293	100	100	293	WP_004199234.1	carbapenem-hydrolyzing class A beta-lactamase KPC-2	NA	NA
KLPN_040_93030107	contig00067	128	922	+	plasmid_AA038	IncX3,rep_cluster_1195	conjugative	blaOXA-48-family	blaOXA-181	OXA-48 family carbapenem-hydrolyzing class D beta-lactamase OXA-181	core	AMR	AMR	BETA-LACTAM	CARBAPENEM	ALLELEX	265	265	100	100	265	WP_015060052.1	OXA-48 family carbapenem-hydrolyzing class D beta-lactamase OXA-181	NA	NA
KLPN_040_93030107	contig00069	6699	7508	-	plasmid_AC125	IncFIB	non-mobilizable	blaNDM	blaNDM-4	subclass B1 metallo-beta-lactamase NDM-4	core	AMR	AMR	BETA-LACTAM	CARBAPENEM	ALLELEX	270	270	100	100	270	WP_063860861.1	subclass B1 metallo-beta-lactamase NDM-4	NA	NA
KLPN_041_93030827	contig00065	4061	4855	+	plasmid_AA038	IncX3,rep_cluster_1195	conjugative	blaOXA-48-family	blaOXA-181	OXA-48 family carbapenem-hydrolyzing class D beta-lactamase OXA-181	core	AMR	AMR	BETA-LACTAM	CARBAPENEM	ALLELEX	265	265	100	100	265	WP_015060052.1	OXA-48 family carbapenem-hydrolyzing class D beta-lactamase OXA-181	NA	NA
KLPN_042_93030409	contig00069	4062	4856	+	plasmid_AA038	IncX3,rep_cluster_1195	conjugative	blaOXA-48-family	blaOXA-181	OXA-48 family carbapenem-hydrolyzing class D beta-lactamase OXA-181	core	AMR	AMR	BETA-LACTAM	CARBAPENEM	ALLELEX	265	265	100	100	265	WP_015060052.1	OXA-48 family carbapenem-hydrolyzing class D beta-lactamase OXA-181	NA	NA
KLPN_043_93031260	contig00084	225	1034	+	chromosome			blaNDM	blaNDM-4	subclass B1 metallo-beta-lactamase NDM-4	core	AMR	AMR	BETA-LACTAM	CARBAPENEM	ALLELEX	270	270	100	100	270	WP_063860861.1	subclass B1 metallo-beta-lactamase NDM-4	NA	NA
KLPN_044_93031466	contig00068	4061	4855	+	plasmid_AA038	IncX3,rep_cluster_1195	conjugative	blaOXA-48-family	blaOXA-181	OXA-48 family carbapenem-hydrolyzing class D beta-lactamase OXA-181	core	AMR	AMR	BETA-LACTAM	CARBAPENEM	ALLELEX	265	265	100	100	265	WP_015060052.1	OXA-48 family carbapenem-hydrolyzing class D beta-lactamase OXA-181	NA	NA
KLPN_044_93031466	contig00079	6710	7519	-	plasmid_AE583	IncFII,rep_cluster_2183	mobilizable	blaNDM	blaNDM-4	subclass B1 metallo-beta-lactamase NDM-4	core	AMR	AMR	BETA-LACTAM	CARBAPENEM	ALLELEX	270	270	100	100	270	WP_063860861.1	subclass B1 metallo-beta-lactamase NDM-4	NA	NA
KLPN_045_93031684	contig00069	4062	4856	+	plasmid_AA038	IncX3,rep_cluster_1195	conjugative	blaOXA-48-family	blaOXA-181	OXA-48 family carbapenem-hydrolyzing class D beta-lactamase OXA-181	core	AMR	AMR	BETA-LACTAM	CARBAPENEM	ALLELEX	265	265	100	100	265	WP_015060052.1	OXA-48 family carbapenem-hydrolyzing class D beta-lactamase OXA-181	NA	NA
KLPN_046_93033118	contig00064	128	922	+	plasmid_AA038	IncX3,rep_cluster_1195	conjugative	blaOXA-48-family	blaOXA-181	OXA-48 family carbapenem-hydrolyzing class D beta-lactamase OXA-181	core	AMR	AMR	BETA-LACTAM	CARBAPENEM	ALLELEX	265	265	100	100	265	WP_015060052.1	OXA-48 family carbapenem-hydrolyzing class D beta-lactamase OXA-181	NA	NA
KLPN_046_93033118	contig00066	6699	7508	-	plasmid_AC125	IncFIB	non-mobilizable	blaNDM	blaNDM-4	subclass B1 metallo-beta-lactamase NDM-4	core	AMR	AMR	BETA-LACTAM	CARBAPENEM	ALLELEX	270	270	100	100	270	WP_063860861.1	subclass B1 metallo-beta-lactamase NDM-4	NA	NA
KLPN_047_93033284	contig00091	138	1016	+	plasmid_AA359	IncU	non-mobilizable	blaKPC	blaKPC-2	carbapenem-hydrolyzing class A beta-lactamase KPC-2	core	AMR	AMR	BETA-LACTAM	CARBAPENEM	ALLELEX	293	293	100	100	293	WP_004199234.1	carbapenem-hydrolyzing class A beta-lactamase KPC-2	NA	NA
KLPN_048_93032411	contig00496	225	1034	+	plasmid_AA038	ColKP3,IncFII,IncX3,rep_cluster_2183	non-mobilizable	blaNDM	blaNDM-4	subclass B1 metallo-beta-lactamase NDM-4	core	AMR	AMR	BETA-LACTAM	CARBAPENEM	ALLELEX	270	270	100	100	270	WP_063860861.1	subclass B1 metallo-beta-lactamase NDM-4	NA	NA
KLPN_048_93032411	contig00177	2282	3076	+	plasmid_AA977	Col156	mobilizable	blaOXA-48-family	blaOXA-48	OXA-48 family carbapenem-hydrolyzing class D beta-lactamase OXA-48	core	AMR	AMR	BETA-LACTAM	CARBAPENEM	ALLELEX	265	265	100	100	265	WP_015059991.1	OXA-48 family carbapenem-hydrolyzing class D beta-lactamase OXA-48	NA	NA
KLPN_049_93034778	contig00179	1021	1815	-	plasmid_AA038	ColKP3,IncX3	non-mobilizable	blaOXA-48-family	blaOXA-181	OXA-48 family carbapenem-hydrolyzing class D beta-lactamase OXA-181	core	AMR	AMR	BETA-LACTAM	CARBAPENEM	ALLELEX	265	265	100	100	265	WP_015060052.1	OXA-48 family carbapenem-hydrolyzing class D beta-lactamase OXA-181	NA	NA
KLPN_050_93035042	contig00070	2282	3076	+	plasmid_AA977	Col156	mobilizable	blaOXA-48-family	blaOXA-48	OXA-48 family carbapenem-hydrolyzing class D beta-lactamase OXA-48	core	AMR	AMR	BETA-LACTAM	CARBAPENEM	ALLELEX	265	265	100	100	265	WP_015059991.1	OXA-48 family carbapenem-hydrolyzing class D beta-lactamase OXA-48	NA	NA
KLPN_051_93035249	contig00141	138	1016	+	plasmid_AA359	-	non-mobilizable	blaKPC	blaKPC-2	carbapenem-hydrolyzing class A beta-lactamase KPC-2	core	AMR	AMR	BETA-LACTAM	CARBAPENEM	ALLELEX	293	293	100	100	293	WP_004199234.1	carbapenem-hydrolyzing class A beta-lactamase KPC-2	NA	NA
KLPN_052_93035554	contig00088	2019	2897	+	plasmid_AA359	IncU	non-mobilizable	blaKPC	blaKPC-2	carbapenem-hydrolyzing class A beta-lactamase KPC-2	core	AMR	AMR	BETA-LACTAM	CARBAPENEM	ALLELEX	293	293	100	100	293	WP_004199234.1	carbapenem-hydrolyzing class A beta-lactamase KPC-2	NA	NA
KLPN_053_93036004	contig00066	201	995	+	plasmid_AA038	IncX3,rep_cluster_1195	conjugative	blaOXA-48-family	blaOXA-181	OXA-48 family carbapenem-hydrolyzing class D beta-lactamase OXA-181	core	AMR	AMR	BETA-LACTAM	CARBAPENEM	ALLELEX	265	265	100	100	265	WP_015060052.1	OXA-48 family carbapenem-hydrolyzing class D beta-lactamase OXA-181	NA	NA
KLPN_053_93036004	contig00069	6702	7511	-	plasmid_AC125	IncFIB	non-mobilizable	blaNDM	blaNDM-4	subclass B1 metallo-beta-lactamase NDM-4	core	AMR	AMR	BETA-LACTAM	CARBAPENEM	ALLELEX	270	270	100	100	270	WP_063860861.1	subclass B1 metallo-beta-lactamase NDM-4	NA	NA
KLPN_054_93036162	contig00076	6702	7511	-	plasmid_AA450	IncFII,rep_cluster_1418,rep_cluster_2183	conjugative	blaNDM	blaNDM-4	subclass B1 metallo-beta-lactamase NDM-4	core	AMR	AMR	BETA-LACTAM	CARBAPENEM	ALLELEX	270	270	100	100	270	WP_063860861.1	subclass B1 metallo-beta-lactamase NDM-4	NA	NA
KLPN_054_93036162	contig00075	2282	3076	+	plasmid_AA977	Col156	mobilizable	blaOXA-48-family	blaOXA-48	OXA-48 family carbapenem-hydrolyzing class D beta-lactamase OXA-48	core	AMR	AMR	BETA-LACTAM	CARBAPENEM	ALLELEX	265	265	100	100	265	WP_015059991.1	OXA-48 family carbapenem-hydrolyzing class D beta-lactamase OXA-48	NA	NA
KLPN_055_93036323	contig00070	2	613	-	plasmid_AC314	-	non-mobilizable	blaNDM	blaNDM	NDM family subclass B1 metallo-beta-lactamase	core	AMR	AMR	BETA-LACTAM	CARBAPENEM	PARTIAL_CONTIG_ENDX	204	270	75.56	100	204	WP_004201164.1	subclass B1 metallo-beta-lactamase NDM-1	NA	NA
KLPN_056_93036337	contig00087	150	1028	+	plasmid_AD312	-	non-mobilizable	blaKPC	blaKPC-2	carbapenem-hydrolyzing class A beta-lactamase KPC-2	core	AMR	AMR	BETA-LACTAM	CARBAPENEM	ALLELEX	293	293	100	100	293	WP_004199234.1	carbapenem-hydrolyzing class A beta-lactamase KPC-2	NA	NA
KLPN_057_93036385	contig00067	4058	4852	+	plasmid_AA038	IncX3,rep_cluster_1195	conjugative	blaOXA-48-family	blaOXA-181	OXA-48 family carbapenem-hydrolyzing class D beta-lactamase OXA-181	core	AMR	AMR	BETA-LACTAM	CARBAPENEM	ALLELEX	265	265	100	100	265	WP_015060052.1	OXA-48 family carbapenem-hydrolyzing class D beta-lactamase OXA-181	NA	NA
KLPN_057_93036385	contig00092	225	1034	+	plasmid_AE583	IncFII,rep_cluster_2183	mobilizable	blaNDM	blaNDM-4	subclass B1 metallo-beta-lactamase NDM-4	core	AMR	AMR	BETA-LACTAM	CARBAPENEM	ALLELEX	270	270	100	100	270	WP_063860861.1	subclass B1 metallo-beta-lactamase NDM-4	NA	NA
KLPN_058_93036919	contig00102	278	1156	+	plasmid_AA275	IncFIB,IncR	conjugative	blaKPC	blaKPC-2	carbapenem-hydrolyzing class A beta-lactamase KPC-2	core	AMR	AMR	BETA-LACTAM	CARBAPENEM	ALLELEX	293	293	100	100	293	WP_004199234.1	carbapenem-hydrolyzing class A beta-lactamase KPC-2	NA	NA
KLPN_059_93036965	contig00102	164	973	+	plasmid_AA274	IncFIB,IncFII,IncFII,rep_cluster_2183	conjugative	blaNDM	blaNDM-5	subclass B1 metallo-beta-lactamase NDM-5	core	AMR	AMR	BETA-LACTAM	CARBAPENEM	ALLELEX	270	270	100	100	270	WP_023408309.1	subclass B1 metallo-beta-lactamase NDM-5	NA	NA
KLPN_060_93037451	contig00093	1365	2243	+	plasmid_AA275	IncFIB,IncR	conjugative	blaKPC	blaKPC-2	carbapenem-hydrolyzing class A beta-lactamase KPC-2	core	AMR	AMR	BETA-LACTAM	CARBAPENEM	ALLELEX	293	293	100	100	293	WP_004199234.1	carbapenem-hydrolyzing class A beta-lactamase KPC-2	NA	NA
KLPN_061_93037472	contig00073	128	922	+	plasmid_AA449	IncFII,rep_cluster_1195,rep_cluster_1418,rep_cluster_2183	conjugative	blaOXA-48-family	blaOXA-181	OXA-48 family carbapenem-hydrolyzing class D beta-lactamase OXA-181	core	AMR	AMR	BETA-LACTAM	CARBAPENEM	ALLELEX	265	265	100	100	265	WP_015060052.1	OXA-48 family carbapenem-hydrolyzing class D beta-lactamase OXA-181	NA	NA
KLPN_061_93037472	contig00104	224	1033	+	plasmid_AA449	IncFII,rep_cluster_1195,rep_cluster_1418,rep_cluster_2183	conjugative	blaNDM	blaNDM-4	subclass B1 metallo-beta-lactamase NDM-4	core	AMR	AMR	BETA-LACTAM	CARBAPENEM	ALLELEX	270	270	100	100	270	WP_063860861.1	subclass B1 metallo-beta-lactamase NDM-4	NA	NA
KLPN_062_93029832	contig00084	6702	7511	-	plasmid_AA450	IncFII,rep_cluster_1418,rep_cluster_2183	conjugative	blaNDM	blaNDM-4	subclass B1 metallo-beta-lactamase NDM-4	core	AMR	AMR	BETA-LACTAM	CARBAPENEM	ALLELEX	270	270	100	100	270	WP_063860861.1	subclass B1 metallo-beta-lactamase NDM-4	NA	NA
KLPN_063_93037343	contig00101	1411	2205	-	plasmid_AA001	IncL/M	non-mobilizable	blaOXA-48-family	blaOXA-48	OXA-48 family carbapenem-hydrolyzing class D beta-lactamase OXA-48	core	AMR	AMR	BETA-LACTAM	CARBAPENEM	ALLELEX	265	265	100	100	265	WP_015059991.1	OXA-48 family carbapenem-hydrolyzing class D beta-lactamase OXA-48	NA	NA
KLPN_064_93037908	contig00086	2019	2897	+	plasmid_AA359	IncU	non-mobilizable	blaKPC	blaKPC-2	carbapenem-hydrolyzing class A beta-lactamase KPC-2	core	AMR	AMR	BETA-LACTAM	CARBAPENEM	ALLELEX	293	293	100	100	293	WP_004199234.1	carbapenem-hydrolyzing class A beta-lactamase KPC-2	NA	NA
KLPN_065_93033267	contig00066	4061	4855	+	plasmid_AA038	IncX3,rep_cluster_1195	conjugative	blaOXA-48-family	blaOXA-181	OXA-48 family carbapenem-hydrolyzing class D beta-lactamase OXA-181	core	AMR	AMR	BETA-LACTAM	CARBAPENEM	ALLELEX	265	265	100	100	265	WP_015060052.1	OXA-48 family carbapenem-hydrolyzing class D beta-lactamase OXA-181	NA	NA
KLPN_066_93032728	contig00102	138	1016	+	plasmid_AA363	IncU	non-mobilizable	blaKPC	blaKPC-2	carbapenem-hydrolyzing class A beta-lactamase KPC-2	core	AMR	AMR	BETA-LACTAM	CARBAPENEM	ALLELEX	293	293	100	100	293	WP_004199234.1	carbapenem-hydrolyzing class A beta-lactamase KPC-2	NA	NA
KLPN_067_93032825	contig00104	226	1035	+	plasmid_AA449	IncFII,rep_cluster_1195,rep_cluster_1418,rep_cluster_2183	conjugative	blaNDM	blaNDM-4	subclass B1 metallo-beta-lactamase NDM-4	core	AMR	AMR	BETA-LACTAM	CARBAPENEM	ALLELEX	270	270	100	100	270	WP_063860861.1	subclass B1 metallo-beta-lactamase NDM-4	NA	NA
KLPN_067_93032825	contig00080	2282	3076	+	plasmid_AA977	Col156	mobilizable	blaOXA-48-family	blaOXA-48	OXA-48 family carbapenem-hydrolyzing class D beta-lactamase OXA-48	core	AMR	AMR	BETA-LACTAM	CARBAPENEM	ALLELEX	265	265	100	100	265	WP_015059991.1	OXA-48 family carbapenem-hydrolyzing class D beta-lactamase OXA-48	NA	NA
KLPN_068_93033000	contig00111	225	1034	+	plasmid_AA449	IncFII,rep_cluster_1195,rep_cluster_1418,rep_cluster_2183	conjugative	blaNDM	blaNDM-4	subclass B1 metallo-beta-lactamase NDM-4	core	AMR	AMR	BETA-LACTAM	CARBAPENEM	ALLELEX	270	270	100	100	270	WP_063860861.1	subclass B1 metallo-beta-lactamase NDM-4	NA	NA
KLPN_068_93033000	contig00089	2282	3076	+	plasmid_AA977	Col156	mobilizable	blaOXA-48-family	blaOXA-48	OXA-48 family carbapenem-hydrolyzing class D beta-lactamase OXA-48	core	AMR	AMR	BETA-LACTAM	CARBAPENEM	ALLELEX	265	265	100	100	265	WP_015059991.1	OXA-48 family carbapenem-hydrolyzing class D beta-lactamase OXA-48	NA	NA
KLPN_069_93038480	contig00078	2190	2999	-	chromosome			blaNDM	blaNDM-5	subclass B1 metallo-beta-lactamase NDM-5	core	AMR	AMR	BETA-LACTAM	CARBAPENEM	ALLELEX	270	270	100	100	270	WP_023408309.1	subclass B1 metallo-beta-lactamase NDM-5	NA	NA
KLPN_069_93038480	contig00073	2152	3030	-	plasmid_AA002	IncL/M	conjugative	blaKPC	blaKPC-2	carbapenem-hydrolyzing class A beta-lactamase KPC-2	core	AMR	AMR	BETA-LACTAM	CARBAPENEM	ALLELEX	293	293	100	100	293	WP_004199234.1	carbapenem-hydrolyzing class A beta-lactamase KPC-2	NA	NA
KLPN_070_93039143	contig00095	1410	2204	-	plasmid_AA001	-	non-mobilizable	blaOXA-48-family	blaOXA-48	OXA-48 family carbapenem-hydrolyzing class D beta-lactamase OXA-48	core	AMR	AMR	BETA-LACTAM	CARBAPENEM	ALLELEX	265	265	100	100	265	WP_015059991.1	OXA-48 family carbapenem-hydrolyzing class D beta-lactamase OXA-48	NA	NA
KLPN_071_93039599	contig00092	225	1034	+	plasmid_AA449	IncFII,rep_cluster_1195,rep_cluster_1418,rep_cluster_2183	conjugative	blaNDM	blaNDM-4	subclass B1 metallo-beta-lactamase NDM-4	core	AMR	AMR	BETA-LACTAM	CARBAPENEM	ALLELEX	270	270	100	100	270	WP_063860861.1	subclass B1 metallo-beta-lactamase NDM-4	NA	NA
KLPN_071_93039599	contig00075	2282	3076	+	plasmid_AA977	Col156	mobilizable	blaOXA-48-family	blaOXA-48	OXA-48 family carbapenem-hydrolyzing class D beta-lactamase OXA-48	core	AMR	AMR	BETA-LACTAM	CARBAPENEM	ALLELEX	265	265	100	100	265	WP_015059991.1	OXA-48 family carbapenem-hydrolyzing class D beta-lactamase OXA-48	NA	NA
KLPN_072_93039668	contig00093	408	1286	+	plasmid_AA359	IncU	non-mobilizable	blaKPC	blaKPC-2	carbapenem-hydrolyzing class A beta-lactamase KPC-2	core	AMR	AMR	BETA-LACTAM	CARBAPENEM	ALLELEX	293	293	100	100	293	WP_004199234.1	carbapenem-hydrolyzing class A beta-lactamase KPC-2	NA	NA
KLPN_073_93039857	contig00177	2	454	-	chromosome			blaNDM	blaNDM	NDM family subclass B1 metallo-beta-lactamase	core	AMR	AMR	BETA-LACTAM	CARBAPENEM	PARTIAL_CONTIG_ENDX	151	270	55.93	100	151	WP_004201164.1	subclass B1 metallo-beta-lactamase NDM-1	NA	NA
KLPN_074_93040952	contig00072	4061	4855	+	plasmid_AA038	IncX3,rep_cluster_1195	conjugative	blaOXA-48-family	blaOXA-181	OXA-48 family carbapenem-hydrolyzing class D beta-lactamase OXA-181	core	AMR	AMR	BETA-LACTAM	CARBAPENEM	ALLELEX	265	265	100	100	265	WP_015060052.1	OXA-48 family carbapenem-hydrolyzing class D beta-lactamase OXA-181	NA	NA
KLPN_074_93040952	contig00111	1	798	+	plasmid_AE583	IncFII,rep_cluster_2183	mobilizable	blaNDM	blaNDM	NDM family subclass B1 metallo-beta-lactamase	core	AMR	AMR	BETA-LACTAM	CARBAPENEM	BLASTX	266	270	98.52	100	266	WP_063860861.1	subclass B1 metallo-beta-lactamase NDM-4	NA	NA
KLPN_075_93037994	contig00077	883	1677	+	plasmid_AC129	rep_cluster_1195	mobilizable	blaOXA-48-family	blaOXA-232	OXA-48 family carbapenem-hydrolyzing class D beta-lactamase OXA-232	core	AMR	AMR	BETA-LACTAM	CARBAPENEM	ALLELEX	265	265	100	100	265	WP_043907054.1	OXA-48 family carbapenem-hydrolyzing class D beta-lactamase OXA-232	NA	NA
KLPN_076_93039010	contig00069	4058	4852	+	plasmid_AA038	IncX3,rep_cluster_1195	conjugative	blaOXA-48-family	blaOXA-181	OXA-48 family carbapenem-hydrolyzing class D beta-lactamase OXA-181	core	AMR	AMR	BETA-LACTAM	CARBAPENEM	ALLELEX	265	265	100	100	265	WP_015060052.1	OXA-48 family carbapenem-hydrolyzing class D beta-lactamase OXA-181	NA	NA
KLPN_076_93039010	contig00086	6701	7498	-	plasmid_AE583	IncFII,rep_cluster_2183	mobilizable	blaNDM	blaNDM	NDM family subclass B1 metallo-beta-lactamase	core	AMR	AMR	BETA-LACTAM	CARBAPENEM	BLASTX	266	270	98.52	100	266	WP_063860861.1	subclass B1 metallo-beta-lactamase NDM-4	NA	NA
KLPN_077_93039219	contig00063	4062	4856	+	plasmid_AA038	IncFII,IncX3,rep_cluster_1195,rep_cluster_2183	conjugative	blaOXA-48-family	blaOXA-181	OXA-48 family carbapenem-hydrolyzing class D beta-lactamase OXA-181	core	AMR	AMR	BETA-LACTAM	CARBAPENEM	ALLELEX	265	265	100	100	265	WP_015060052.1	OXA-48 family carbapenem-hydrolyzing class D beta-lactamase OXA-181	NA	NA
KLPN_078_93039628	contig00075	6695	7504	-	plasmid_AA450	IncFII,IncFII,rep_cluster_1418,rep_cluster_2183	conjugative	blaNDM	blaNDM-4	subclass B1 metallo-beta-lactamase NDM-4	core	AMR	AMR	BETA-LACTAM	CARBAPENEM	ALLELEX	270	270	100	100	270	WP_063860861.1	subclass B1 metallo-beta-lactamase NDM-4	NA	NA
KLPN_079_93041548	contig00089	138	1016	+	plasmid_AA359	IncU	non-mobilizable	blaKPC	blaKPC-2	carbapenem-hydrolyzing class A beta-lactamase KPC-2	core	AMR	AMR	BETA-LACTAM	CARBAPENEM	ALLELEX	293	293	100	100	293	WP_004199234.1	carbapenem-hydrolyzing class A beta-lactamase KPC-2	NA	NA
KLPN_080_93042027	contig00082	2019	2897	+	plasmid_AA552	IncN	conjugative	blaKPC	blaKPC-2	carbapenem-hydrolyzing class A beta-lactamase KPC-2	core	AMR	AMR	BETA-LACTAM	CARBAPENEM	ALLELEX	293	293	100	100	293	WP_004199234.1	carbapenem-hydrolyzing class A beta-lactamase KPC-2	NA	NA
KLPN_081_93042546	contig00070	3058	3867	-	plasmid_AC212	IncU	non-mobilizable	blaNDM	blaNDM-1	subclass B1 metallo-beta-lactamase NDM-1	core	AMR	AMR	BETA-LACTAM	CARBAPENEM	ALLELEX	270	270	100	100	270	WP_004201164.1	subclass B1 metallo-beta-lactamase NDM-1	NA	NA
KLPN_082_93042308	contig00068	4062	4856	+	plasmid_AA038	IncX3,rep_cluster_1195	conjugative	blaOXA-48-family	blaOXA-181	OXA-48 family carbapenem-hydrolyzing class D beta-lactamase OXA-181	core	AMR	AMR	BETA-LACTAM	CARBAPENEM	ALLELEX	265	265	100	100	265	WP_015060052.1	OXA-48 family carbapenem-hydrolyzing class D beta-lactamase OXA-181	NA	NA
KLPN_083_93042439	contig00074	1626	2420	+	plasmid_AA038	IncX3,rep_cluster_1195	conjugative	blaOXA-48-family	blaOXA-181	OXA-48 family carbapenem-hydrolyzing class D beta-lactamase OXA-181	core	AMR	AMR	BETA-LACTAM	CARBAPENEM	ALLELEX	265	265	100	100	265	WP_015060052.1	OXA-48 family carbapenem-hydrolyzing class D beta-lactamase OXA-181	NA	NA
KLPN_083_93042439	contig00084	6701	7498	-	plasmid_AE583	IncFII,rep_cluster_2183	mobilizable	blaNDM	blaNDM	NDM family subclass B1 metallo-beta-lactamase	core	AMR	AMR	BETA-LACTAM	CARBAPENEM	BLASTX	266	270	98.52	100	266	WP_063860861.1	subclass B1 metallo-beta-lactamase NDM-4	NA	NA
KLPN_084_93042871	contig00101	150	1028	+	chromosome			blaKPC	blaKPC-2	carbapenem-hydrolyzing class A beta-lactamase KPC-2	core	AMR	AMR	BETA-LACTAM	CARBAPENEM	ALLELEX	293	293	100	100	293	WP_004199234.1	carbapenem-hydrolyzing class A beta-lactamase KPC-2	NA	NA
KLPN_084_93042871	contig00073	2720	3514	+	plasmid_AA038	IncX3,rep_cluster_1195	conjugative	blaOXA-48-family	blaOXA-181	OXA-48 family carbapenem-hydrolyzing class D beta-lactamase OXA-181	core	AMR	AMR	BETA-LACTAM	CARBAPENEM	ALLELEX	265	265	100	100	265	WP_015060052.1	OXA-48 family carbapenem-hydrolyzing class D beta-lactamase OXA-181	NA	NA
KLPN_084_93042871	contig00088	813	1622	+	plasmid_AA338	IncFIA,IncFIC	conjugative	blaNDM	blaNDM-5	subclass B1 metallo-beta-lactamase NDM-5	core	AMR	AMR	BETA-LACTAM	CARBAPENEM	ALLELEX	270	270	100	100	270	WP_023408309.1	subclass B1 metallo-beta-lactamase NDM-5	NA	NA
KLPN_085_93042247	contig00064	4062	4856	+	plasmid_AA038	IncX3,rep_cluster_1195	conjugative	blaOXA-48-family	blaOXA-181	OXA-48 family carbapenem-hydrolyzing class D beta-lactamase OXA-181	core	AMR	AMR	BETA-LACTAM	CARBAPENEM	ALLELEX	265	265	100	100	265	WP_015060052.1	OXA-48 family carbapenem-hydrolyzing class D beta-lactamase OXA-181	NA	NA
KLPN_086_93042358	contig00081	138	1016	+	plasmid_AA359	IncU	non-mobilizable	blaKPC	blaKPC-2	carbapenem-hydrolyzing class A beta-lactamase KPC-2	core	AMR	AMR	BETA-LACTAM	CARBAPENEM	ALLELEX	293	293	100	100	293	WP_004199234.1	carbapenem-hydrolyzing class A beta-lactamase KPC-2	NA	NA
KLPN_087_93042930	contig00065	373	1167	+	plasmid_AA038	IncX3,rep_cluster_1195	conjugative	blaOXA-48-family	blaOXA-181	OXA-48 family carbapenem-hydrolyzing class D beta-lactamase OXA-181	core	AMR	AMR	BETA-LACTAM	CARBAPENEM	ALLELEX	265	265	100	100	265	WP_015060052.1	OXA-48 family carbapenem-hydrolyzing class D beta-lactamase OXA-181	NA	NA
KLPN_087_93042930	contig00073	225	1034	+	plasmid_AC125	IncFIB	non-mobilizable	blaNDM	blaNDM-4	subclass B1 metallo-beta-lactamase NDM-4	core	AMR	AMR	BETA-LACTAM	CARBAPENEM	ALLELEX	270	270	100	100	270	WP_063860861.1	subclass B1 metallo-beta-lactamase NDM-4	NA	NA
KLPN_088_93043270	contig00059	128	922	+	plasmid_AA038	IncX3,rep_cluster_1195	conjugative	blaOXA-48-family	blaOXA-181	OXA-48 family carbapenem-hydrolyzing class D beta-lactamase OXA-181	core	AMR	AMR	BETA-LACTAM	CARBAPENEM	ALLELEX	265	265	100	100	265	WP_015060052.1	OXA-48 family carbapenem-hydrolyzing class D beta-lactamase OXA-181	NA	NA
KLPN_088_93043270	contig00061	6699	7508	-	plasmid_AC125	IncFIB	non-mobilizable	blaNDM	blaNDM-4	subclass B1 metallo-beta-lactamase NDM-4	core	AMR	AMR	BETA-LACTAM	CARBAPENEM	ALLELEX	270	270	100	100	270	WP_063860861.1	subclass B1 metallo-beta-lactamase NDM-4	NA	NA
KLPN_089_93042973	contig00079	2282	3076	+	plasmid_AA977	Col156	mobilizable	blaOXA-48-family	blaOXA-48	OXA-48 family carbapenem-hydrolyzing class D beta-lactamase OXA-48	core	AMR	AMR	BETA-LACTAM	CARBAPENEM	ALLELEX	265	265	100	100	265	WP_015059991.1	OXA-48 family carbapenem-hydrolyzing class D beta-lactamase OXA-48	NA	NA
KLPN_090_93043394	contig00080	2282	3076	+	plasmid_AA977	Col156	mobilizable	blaOXA-48-family	blaOXA-48	OXA-48 family carbapenem-hydrolyzing class D beta-lactamase OXA-48	core	AMR	AMR	BETA-LACTAM	CARBAPENEM	ALLELEX	265	265	100	100	265	WP_015059991.1	OXA-48 family carbapenem-hydrolyzing class D beta-lactamase OXA-48	NA	NA
KLPN_091_93043631	contig00077	6702	7511	-	plasmid_AA450	IncFII,rep_cluster_1418,rep_cluster_2183	conjugative	blaNDM	blaNDM-4	subclass B1 metallo-beta-lactamase NDM-4	core	AMR	AMR	BETA-LACTAM	CARBAPENEM	ALLELEX	270	270	100	100	270	WP_063860861.1	subclass B1 metallo-beta-lactamase NDM-4	NA	NA
KLPN_092_93043857	contig00071	6701	7510	-	chromosome			blaNDM	blaNDM-4	subclass B1 metallo-beta-lactamase NDM-4	core	AMR	AMR	BETA-LACTAM	CARBAPENEM	ALLELEX	270	270	100	100	270	WP_063860861.1	subclass B1 metallo-beta-lactamase NDM-4	NA	NA
KLPN_093_93044613	contig00065	128	922	+	plasmid_AA038	IncX3,rep_cluster_1195	conjugative	blaOXA-48-family	blaOXA-181	OXA-48 family carbapenem-hydrolyzing class D beta-lactamase OXA-181	core	AMR	AMR	BETA-LACTAM	CARBAPENEM	ALLELEX	265	265	100	100	265	WP_015060052.1	OXA-48 family carbapenem-hydrolyzing class D beta-lactamase OXA-181	NA	NA
KLPN_093_93044613	contig00068	6699	7508	-	plasmid_AC125	IncFIB	non-mobilizable	blaNDM	blaNDM-4	subclass B1 metallo-beta-lactamase NDM-4	core	AMR	AMR	BETA-LACTAM	CARBAPENEM	ALLELEX	270	270	100	100	270	WP_063860861.1	subclass B1 metallo-beta-lactamase NDM-4	NA	NA
KLPN_094_93044555	contig00064	4061	4855	+	plasmid_AA038	IncX3,rep_cluster_1195	conjugative	blaOXA-48-family	blaOXA-181	OXA-48 family carbapenem-hydrolyzing class D beta-lactamase OXA-181	core	AMR	AMR	BETA-LACTAM	CARBAPENEM	ALLELEX	265	265	100	100	265	WP_015060052.1	OXA-48 family carbapenem-hydrolyzing class D beta-lactamase OXA-181	NA	NA
KLPN_094_93044555	contig00104	225	1034	+	plasmid_AE583	IncFII	mobilizable	blaNDM	blaNDM-4	subclass B1 metallo-beta-lactamase NDM-4	core	AMR	AMR	BETA-LACTAM	CARBAPENEM	ALLELEX	270	270	100	100	270	WP_063860861.1	subclass B1 metallo-beta-lactamase NDM-4	NA	NA
KLPN_095_93046126	contig00067	6699	7508	-	plasmid_AC125	IncFIB	non-mobilizable	blaNDM	blaNDM-4	subclass B1 metallo-beta-lactamase NDM-4	core	AMR	AMR	BETA-LACTAM	CARBAPENEM	ALLELEX	270	270	100	100	270	WP_063860861.1	subclass B1 metallo-beta-lactamase NDM-4	NA	NA
KLPN_096_93046463	contig00060	4061	4855	+	plasmid_AA038	IncX3,rep_cluster_1195	conjugative	blaOXA-48-family	blaOXA-181	OXA-48 family carbapenem-hydrolyzing class D beta-lactamase OXA-181	core	AMR	AMR	BETA-LACTAM	CARBAPENEM	ALLELEX	265	265	100	100	265	WP_015060052.1	OXA-48 family carbapenem-hydrolyzing class D beta-lactamase OXA-181	NA	NA
KLPN_097_93046503	contig00067	191	985	+	plasmid_AA038	IncX3,rep_cluster_1195	conjugative	blaOXA-48-family	blaOXA-181	OXA-48 family carbapenem-hydrolyzing class D beta-lactamase OXA-181	core	AMR	AMR	BETA-LACTAM	CARBAPENEM	ALLELEX	265	265	100	100	265	WP_015060052.1	OXA-48 family carbapenem-hydrolyzing class D beta-lactamase OXA-181	NA	NA
KLPN_097_93046503	contig00069	6699	7508	-	plasmid_AC125	IncFIB	non-mobilizable	blaNDM	blaNDM-4	subclass B1 metallo-beta-lactamase NDM-4	core	AMR	AMR	BETA-LACTAM	CARBAPENEM	ALLELEX	270	270	100	100	270	WP_063860861.1	subclass B1 metallo-beta-lactamase NDM-4	NA	NA
KLPN_098_93046663	contig00066	2849	3643	+	plasmid_AA038	IncX3,rep_cluster_1195	conjugative	blaOXA-48-family	blaOXA-181	OXA-48 family carbapenem-hydrolyzing class D beta-lactamase OXA-181	core	AMR	AMR	BETA-LACTAM	CARBAPENEM	ALLELEX	265	265	100	100	265	WP_015060052.1	OXA-48 family carbapenem-hydrolyzing class D beta-lactamase OXA-181	NA	NA
KLPN_099_93046681	contig00065	4062	4856	+	plasmid_AA038	IncX3,rep_cluster_1195	conjugative	blaOXA-48-family	blaOXA-181	OXA-48 family carbapenem-hydrolyzing class D beta-lactamase OXA-181	core	AMR	AMR	BETA-LACTAM	CARBAPENEM	ALLELEX	265	265	100	100	265	WP_015060052.1	OXA-48 family carbapenem-hydrolyzing class D beta-lactamase OXA-181	NA	NA
KLPN_100_93046964	contig00071	128	922	+	plasmid_AA038	IncX3,rep_cluster_1195	conjugative	blaOXA-48-family	blaOXA-181	OXA-48 family carbapenem-hydrolyzing class D beta-lactamase OXA-181	core	AMR	AMR	BETA-LACTAM	CARBAPENEM	ALLELEX	265	265	100	100	265	WP_015060052.1	OXA-48 family carbapenem-hydrolyzing class D beta-lactamase OXA-181	NA	NA
KLPN_100_93046964	contig00087	225	1034	+	plasmid_AA449	IncFII,rep_cluster_1418,rep_cluster_2183	conjugative	blaNDM	blaNDM-4	subclass B1 metallo-beta-lactamase NDM-4	core	AMR	AMR	BETA-LACTAM	CARBAPENEM	ALLELEX	270	270	100	100	270	WP_063860861.1	subclass B1 metallo-beta-lactamase NDM-4	NA	NA
KLPN_101_93047543	contig00087	6695	7504	-	plasmid_AA450	IncFII,rep_cluster_1418	conjugative	blaNDM	blaNDM-4	subclass B1 metallo-beta-lactamase NDM-4	core	AMR	AMR	BETA-LACTAM	CARBAPENEM	ALLELEX	270	270	100	100	270	WP_063860861.1	subclass B1 metallo-beta-lactamase NDM-4	NA	NA
KLPN_102_93042491	contig00113	1834	2628	-	plasmid_AA038	IncFII,IncX3,rep_cluster_1195,rep_cluster_2183	conjugative	blaOXA-48-family	blaOXA-181	OXA-48 family carbapenem-hydrolyzing class D beta-lactamase OXA-181	core	AMR	AMR	BETA-LACTAM	CARBAPENEM	ALLELEX	265	265	100	100	265	WP_015060052.1	OXA-48 family carbapenem-hydrolyzing class D beta-lactamase OXA-181	NA	NA
KLPN_102_93042491	contig00093	138	1016	+	plasmid_AA359	IncU	non-mobilizable	blaKPC	blaKPC-2	carbapenem-hydrolyzing class A beta-lactamase KPC-2	core	AMR	AMR	BETA-LACTAM	CARBAPENEM	ALLELEX	293	293	100	100	293	WP_004199234.1	carbapenem-hydrolyzing class A beta-lactamase KPC-2	NA	NA
KLPN_103_93042886	contig00079	128	922	+	plasmid_AC313	rep_cluster_1195	non-mobilizable	blaOXA-48-family	blaOXA-181	OXA-48 family carbapenem-hydrolyzing class D beta-lactamase OXA-181	core	AMR	AMR	BETA-LACTAM	CARBAPENEM	ALLELEX	265	265	100	100	265	WP_015060052.1	OXA-48 family carbapenem-hydrolyzing class D beta-lactamase OXA-181	NA	NA
KLPN_103_93042886	contig00127	225	1034	+	plasmid_AE583	IncFII,rep_cluster_2183	mobilizable	blaNDM	blaNDM-4	subclass B1 metallo-beta-lactamase NDM-4	core	AMR	AMR	BETA-LACTAM	CARBAPENEM	ALLELEX	270	270	100	100	270	WP_063860861.1	subclass B1 metallo-beta-lactamase NDM-4	NA	NA
KLPN_104_93044509	contig00079	6702	7511	-	plasmid_AA450	IncFII,rep_cluster_1418,rep_cluster_2183	conjugative	blaNDM	blaNDM-4	subclass B1 metallo-beta-lactamase NDM-4	core	AMR	AMR	BETA-LACTAM	CARBAPENEM	ALLELEX	270	270	100	100	270	WP_063860861.1	subclass B1 metallo-beta-lactamase NDM-4	NA	NA
KLPN_105_93044250	contig00082	225	1034	+	plasmid_AA449	IncFII,rep_cluster_1195,rep_cluster_1418,rep_cluster_2183	conjugative	blaNDM	blaNDM-4	subclass B1 metallo-beta-lactamase NDM-4	core	AMR	AMR	BETA-LACTAM	CARBAPENEM	ALLELEX	270	270	100	100	270	WP_063860861.1	subclass B1 metallo-beta-lactamase NDM-4	NA	NA
KLPN_105_93044250	contig00069	2282	3076	+	plasmid_AA977	Col156	mobilizable	blaOXA-48-family	blaOXA-48	OXA-48 family carbapenem-hydrolyzing class D beta-lactamase OXA-48	core	AMR	AMR	BETA-LACTAM	CARBAPENEM	ALLELEX	265	265	100	100	265	WP_015059991.1	OXA-48 family carbapenem-hydrolyzing class D beta-lactamase OXA-48	NA	NA
KLPN_106_93048000	contig00096	2777	3655	-	plasmid_AA359	-	non-mobilizable	blaKPC	blaKPC-2	carbapenem-hydrolyzing class A beta-lactamase KPC-2	core	AMR	AMR	BETA-LACTAM	CARBAPENEM	ALLELEX	293	293	100	100	293	WP_004199234.1	carbapenem-hydrolyzing class A beta-lactamase KPC-2	NA	NA
KLPN_107_93047974	contig00089	225	1034	+	plasmid_AA450	IncFII,rep_cluster_1418,rep_cluster_2183	conjugative	blaNDM	blaNDM-4	subclass B1 metallo-beta-lactamase NDM-4	core	AMR	AMR	BETA-LACTAM	CARBAPENEM	ALLELEX	270	270	100	100	270	WP_063860861.1	subclass B1 metallo-beta-lactamase NDM-4	NA	NA
KLPN_108_93047874	contig00089	6695	7504	-	plasmid_AA450	IncFII,rep_cluster_1418,rep_cluster_2183	conjugative	blaNDM	blaNDM-4	subclass B1 metallo-beta-lactamase NDM-4	core	AMR	AMR	BETA-LACTAM	CARBAPENEM	ALLELEX	270	270	100	100	270	WP_063860861.1	subclass B1 metallo-beta-lactamase NDM-4	NA	NA
KLPN_109_93047985	contig00071	4062	4856	+	plasmid_AA038	IncX3,rep_cluster_1195	conjugative	blaOXA-48-family	blaOXA-181	OXA-48 family carbapenem-hydrolyzing class D beta-lactamase OXA-181	core	AMR	AMR	BETA-LACTAM	CARBAPENEM	ALLELEX	265	265	100	100	265	WP_015060052.1	OXA-48 family carbapenem-hydrolyzing class D beta-lactamase OXA-181	NA	NA
KLPN_110_93048775	contig00070	4058	4852	+	plasmid_AA038	IncX3,rep_cluster_1195	conjugative	blaOXA-48-family	blaOXA-181	OXA-48 family carbapenem-hydrolyzing class D beta-lactamase OXA-181	core	AMR	AMR	BETA-LACTAM	CARBAPENEM	ALLELEX	265	265	100	100	265	WP_015060052.1	OXA-48 family carbapenem-hydrolyzing class D beta-lactamase OXA-181	NA	NA
KLPN_110_93048775	contig00080	6701	7510	-	plasmid_AE583	IncFII,rep_cluster_2183	mobilizable	blaNDM	blaNDM-4	subclass B1 metallo-beta-lactamase NDM-4	core	AMR	AMR	BETA-LACTAM	CARBAPENEM	ALLELEX	270	270	100	100	270	WP_063860861.1	subclass B1 metallo-beta-lactamase NDM-4	NA	NA
KLPN_111_93048883	contig00068	128	922	+	plasmid_AA449	IncFII,rep_cluster_1195,rep_cluster_1418,rep_cluster_2183	conjugative	blaOXA-48-family	blaOXA-181	OXA-48 family carbapenem-hydrolyzing class D beta-lactamase OXA-181	core	AMR	AMR	BETA-LACTAM	CARBAPENEM	ALLELEX	265	265	100	100	265	WP_015060052.1	OXA-48 family carbapenem-hydrolyzing class D beta-lactamase OXA-181	NA	NA
KLPN_111_93048883	contig00072	6699	7508	-	plasmid_AC125	IncFIB	non-mobilizable	blaNDM	blaNDM-4	subclass B1 metallo-beta-lactamase NDM-4	core	AMR	AMR	BETA-LACTAM	CARBAPENEM	ALLELEX	270	270	100	100	270	WP_063860861.1	subclass B1 metallo-beta-lactamase NDM-4	NA	NA
KLPN_112_93049288	contig00101	1835	2629	-	plasmid_AC130	rep_cluster_1195	non-mobilizable	blaOXA-48-family	blaOXA-181	OXA-48 family carbapenem-hydrolyzing class D beta-lactamase OXA-181	core	AMR	AMR	BETA-LACTAM	CARBAPENEM	ALLELEX	265	265	100	100	265	WP_015060052.1	OXA-48 family carbapenem-hydrolyzing class D beta-lactamase OXA-181	NA	NA
KLPN_113_93042202	contig00093	225	1034	+	plasmid_AA449	IncFII,rep_cluster_1195,rep_cluster_1418,rep_cluster_2183	conjugative	blaNDM	blaNDM-4	subclass B1 metallo-beta-lactamase NDM-4	core	AMR	AMR	BETA-LACTAM	CARBAPENEM	ALLELEX	270	270	100	100	270	WP_063860861.1	subclass B1 metallo-beta-lactamase NDM-4	NA	NA
KLPN_113_93042202	contig00076	2282	3076	+	plasmid_AA977	Col156	mobilizable	blaOXA-48-family	blaOXA-48	OXA-48 family carbapenem-hydrolyzing class D beta-lactamase OXA-48	core	AMR	AMR	BETA-LACTAM	CARBAPENEM	ALLELEX	265	265	100	100	265	WP_015059991.1	OXA-48 family carbapenem-hydrolyzing class D beta-lactamase OXA-48	NA	NA
KLPN_114_93050705	contig00066	12097	12891	-	plasmid_AA038	IncX3,rep_cluster_1195	conjugative	blaOXA-48-family	blaOXA-181	OXA-48 family carbapenem-hydrolyzing class D beta-lactamase OXA-181	core	AMR	AMR	BETA-LACTAM	CARBAPENEM	ALLELEX	265	265	100	100	265	WP_015060052.1	OXA-48 family carbapenem-hydrolyzing class D beta-lactamase OXA-181	NA	NA
KLPN_115_93052119	contig00116	445	1239	-	plasmid_AA002	IncL/M	conjugative	blaOXA-48-family	blaOXA-48	OXA-48 family carbapenem-hydrolyzing class D beta-lactamase OXA-48	core	AMR	AMR	BETA-LACTAM	CARBAPENEM	ALLELEX	265	265	100	100	265	WP_015059991.1	OXA-48 family carbapenem-hydrolyzing class D beta-lactamase OXA-48	NA	NA
KLPN_116_93052396	contig00061	11630	12424	-	plasmid_AA002	IncL/M	conjugative	blaOXA-48-family	blaOXA-48	OXA-48 family carbapenem-hydrolyzing class D beta-lactamase OXA-48	core	AMR	AMR	BETA-LACTAM	CARBAPENEM	ALLELEX	265	265	100	100	265	WP_015059991.1	OXA-48 family carbapenem-hydrolyzing class D beta-lactamase OXA-48	NA	NA
KLPN_117_93052371	contig00092	1365	2243	+	chromosome			blaKPC	blaKPC-2	carbapenem-hydrolyzing class A beta-lactamase KPC-2	core	AMR	AMR	BETA-LACTAM	CARBAPENEM	ALLELEX	293	293	100	100	293	WP_004199234.1	carbapenem-hydrolyzing class A beta-lactamase KPC-2	NA	NA
KLPN_117_93052371	contig00071	4062	4856	+	plasmid_AA038	IncX3,rep_cluster_1195,rep_cluster_2327	conjugative	blaOXA-48-family	blaOXA-181	OXA-48 family carbapenem-hydrolyzing class D beta-lactamase OXA-181	core	AMR	AMR	BETA-LACTAM	CARBAPENEM	ALLELEX	265	265	100	100	265	WP_015060052.1	OXA-48 family carbapenem-hydrolyzing class D beta-lactamase OXA-181	NA	NA
KLPN_117_93052371	contig00088	304	1113	+	plasmid_AA338	IncFIA,IncFIC	conjugative	blaNDM	blaNDM-5	subclass B1 metallo-beta-lactamase NDM-5	core	AMR	AMR	BETA-LACTAM	CARBAPENEM	ALLELEX	270	270	100	100	270	WP_023408309.1	subclass B1 metallo-beta-lactamase NDM-5	NA	NA
KLPN_118_93052926	contig00091	150	1028	+	chromosome			blaKPC	blaKPC-2	carbapenem-hydrolyzing class A beta-lactamase KPC-2	core	AMR	AMR	BETA-LACTAM	CARBAPENEM	ALLELEX	293	293	100	100	293	WP_004199234.1	carbapenem-hydrolyzing class A beta-lactamase KPC-2	NA	NA
KLPN_118_93052926	contig00066	4062	4856	+	plasmid_AA038	IncX3,rep_cluster_1195	conjugative	blaOXA-48-family	blaOXA-181	OXA-48 family carbapenem-hydrolyzing class D beta-lactamase OXA-181	core	AMR	AMR	BETA-LACTAM	CARBAPENEM	ALLELEX	265	265	100	100	265	WP_015060052.1	OXA-48 family carbapenem-hydrolyzing class D beta-lactamase OXA-181	NA	NA
KLPN_118_93052926	contig00081	304	1113	+	plasmid_AA338	IncFIA,IncFIC	conjugative	blaNDM	blaNDM-5	subclass B1 metallo-beta-lactamase NDM-5	core	AMR	AMR	BETA-LACTAM	CARBAPENEM	ALLELEX	270	270	100	100	270	WP_023408309.1	subclass B1 metallo-beta-lactamase NDM-5	NA	NA
KLPN_119_93054955	contig00073	128	922	+	plasmid_AA449	IncFII,rep_cluster_1195,rep_cluster_1418,rep_cluster_2183	conjugative	blaOXA-48-family	blaOXA-181	OXA-48 family carbapenem-hydrolyzing class D beta-lactamase OXA-181	core	AMR	AMR	BETA-LACTAM	CARBAPENEM	ALLELEX	265	265	100	100	265	WP_015060052.1	OXA-48 family carbapenem-hydrolyzing class D beta-lactamase OXA-181	NA	NA
KLPN_120_93055040	contig00089	225	1034	+	plasmid_AA449	IncFII,rep_cluster_1195,rep_cluster_1418,rep_cluster_2183	conjugative	blaNDM	blaNDM-4	subclass B1 metallo-beta-lactamase NDM-4	core	AMR	AMR	BETA-LACTAM	CARBAPENEM	ALLELEX	270	270	100	100	270	WP_063860861.1	subclass B1 metallo-beta-lactamase NDM-4	NA	NA
KLPN_120_93055040	contig00074	2282	3076	+	plasmid_AA977	Col156	mobilizable	blaOXA-48-family	blaOXA-48	OXA-48 family carbapenem-hydrolyzing class D beta-lactamase OXA-48	core	AMR	AMR	BETA-LACTAM	CARBAPENEM	ALLELEX	265	265	100	100	265	WP_015059991.1	OXA-48 family carbapenem-hydrolyzing class D beta-lactamase OXA-48	NA	NA
KLPN_121_93056470	contig00078	6695	7504	-	plasmid_AA038	IncX3,rep_cluster_1195	conjugative	blaNDM	blaNDM-4	subclass B1 metallo-beta-lactamase NDM-4	core	AMR	AMR	BETA-LACTAM	CARBAPENEM	ALLELEX	270	270	100	100	270	WP_063860861.1	subclass B1 metallo-beta-lactamase NDM-4	NA	NA
KLPN_121_93056470	contig00118	167	961	+	plasmid_AA038	IncX3,rep_cluster_1195	conjugative	blaOXA-48-family	blaOXA-181	OXA-48 family carbapenem-hydrolyzing class D beta-lactamase OXA-181	core	AMR	AMR	BETA-LACTAM	CARBAPENEM	ALLELEX	265	265	100	100	265	WP_015060052.1	OXA-48 family carbapenem-hydrolyzing class D beta-lactamase OXA-181	NA	NA
KLPN_122_93057723	contig00094	1365	2243	+	chromosome			blaKPC	blaKPC-2	carbapenem-hydrolyzing class A beta-lactamase KPC-2	core	AMR	AMR	BETA-LACTAM	CARBAPENEM	ALLELEX	293	293	100	100	293	WP_004199234.1	carbapenem-hydrolyzing class A beta-lactamase KPC-2	NA	NA
KLPN_122_93057723	contig00072	4062	4856	+	plasmid_AA038	IncX3,rep_cluster_1195,rep_cluster_2327	conjugative	blaOXA-48-family	blaOXA-181	OXA-48 family carbapenem-hydrolyzing class D beta-lactamase OXA-181	core	AMR	AMR	BETA-LACTAM	CARBAPENEM	ALLELEX	265	265	100	100	265	WP_015060052.1	OXA-48 family carbapenem-hydrolyzing class D beta-lactamase OXA-181	NA	NA
KLPN_122_93057723	contig00091	580	1389	+	plasmid_AA338	IncFIA,IncFIC	conjugative	blaNDM	blaNDM-5	subclass B1 metallo-beta-lactamase NDM-5	core	AMR	AMR	BETA-LACTAM	CARBAPENEM	ALLELEX	270	270	100	100	270	WP_023408309.1	subclass B1 metallo-beta-lactamase NDM-5	NA	NA
KLPN_123_93058570	contig00090	138	1016	+	plasmid_AA359	IncU	non-mobilizable	blaKPC	blaKPC-2	carbapenem-hydrolyzing class A beta-lactamase KPC-2	core	AMR	AMR	BETA-LACTAM	CARBAPENEM	ALLELEX	293	293	100	100	293	WP_004199234.1	carbapenem-hydrolyzing class A beta-lactamase KPC-2	NA	NA
KLPN_124_93058930	contig00121	138	1016	+	plasmid_AA359	-	non-mobilizable	blaKPC	blaKPC-2	carbapenem-hydrolyzing class A beta-lactamase KPC-2	core	AMR	AMR	BETA-LACTAM	CARBAPENEM	ALLELEX	293	293	100	100	293	WP_004199234.1	carbapenem-hydrolyzing class A beta-lactamase KPC-2	NA	NA
KLPN_125_93059349	contig00101	1365	2243	+	plasmid_AA275	IncFIB,IncR	conjugative	blaKPC	blaKPC-2	carbapenem-hydrolyzing class A beta-lactamase KPC-2	core	AMR	AMR	BETA-LACTAM	CARBAPENEM	ALLELEX	293	293	100	100	293	WP_004199234.1	carbapenem-hydrolyzing class A beta-lactamase KPC-2	NA	NA
KLPN_126_93059958	contig00085	225	1034	+	plasmid_AA449	IncFII,rep_cluster_1195,rep_cluster_1418,rep_cluster_2183	conjugative	blaNDM	blaNDM-4	subclass B1 metallo-beta-lactamase NDM-4	core	AMR	AMR	BETA-LACTAM	CARBAPENEM	ALLELEX	270	270	100	100	270	WP_063860861.1	subclass B1 metallo-beta-lactamase NDM-4	NA	NA
KLPN_126_93059958	contig00074	2282	3076	+	plasmid_AA977	Col156	mobilizable	blaOXA-48-family	blaOXA-48	OXA-48 family carbapenem-hydrolyzing class D beta-lactamase OXA-48	core	AMR	AMR	BETA-LACTAM	CARBAPENEM	ALLELEX	265	265	100	100	265	WP_015059991.1	OXA-48 family carbapenem-hydrolyzing class D beta-lactamase OXA-48	NA	NA
KLPN_127_93062326	contig00065	225	1034	+	chromosome			blaNDM	blaNDM-4	subclass B1 metallo-beta-lactamase NDM-4	core	AMR	AMR	BETA-LACTAM	CARBAPENEM	ALLELEX	270	270	100	100	270	WP_063860861.1	subclass B1 metallo-beta-lactamase NDM-4	NA	NA
KLPN_128_93062961	contig00084	7585	8463	+	plasmid_AA275	IncFIB,IncR	conjugative	blaKPC	blaKPC-2	carbapenem-hydrolyzing class A beta-lactamase KPC-2	core	AMR	AMR	BETA-LACTAM	CARBAPENEM	ALLELEX	293	293	100	100	293	WP_004199234.1	carbapenem-hydrolyzing class A beta-lactamase KPC-2	NA	NA
KLPN_129_93064685	contig00092	3925	4803	+	plasmid_AA359	IncU	non-mobilizable	blaKPC	blaKPC-2	carbapenem-hydrolyzing class A beta-lactamase KPC-2	core	AMR	AMR	BETA-LACTAM	CARBAPENEM	ALLELEX	293	293	100	100	293	WP_004199234.1	carbapenem-hydrolyzing class A beta-lactamase KPC-2	NA	NA
KLPN_130_93065447	contig00091	138	1016	+	plasmid_AA359	IncU	non-mobilizable	blaKPC	blaKPC-2	carbapenem-hydrolyzing class A beta-lactamase KPC-2	core	AMR	AMR	BETA-LACTAM	CARBAPENEM	ALLELEX	293	293	100	100	293	WP_004199234.1	carbapenem-hydrolyzing class A beta-lactamase KPC-2	NA	NA
KLPN_131_93065602	contig00068	6699	7508	-	plasmid_AC125	IncFIB	non-mobilizable	blaNDM	blaNDM-4	subclass B1 metallo-beta-lactamase NDM-4	core	AMR	AMR	BETA-LACTAM	CARBAPENEM	ALLELEX	270	270	100	100	270	WP_063860861.1	subclass B1 metallo-beta-lactamase NDM-4	NA	NA
KLPN_132_93072370	contig00090	138	1016	+	plasmid_AA359	IncU	non-mobilizable	blaKPC	blaKPC-2	carbapenem-hydrolyzing class A beta-lactamase KPC-2	core	AMR	AMR	BETA-LACTAM	CARBAPENEM	ALLELEX	293	293	100	100	293	WP_004199234.1	carbapenem-hydrolyzing class A beta-lactamase KPC-2	NA	NA
KLPN_133_93075962	contig00071	128	922	+	plasmid_AA449	IncFII,rep_cluster_1195,rep_cluster_1418,rep_cluster_2183	conjugative	blaOXA-48-family	blaOXA-181	OXA-48 family carbapenem-hydrolyzing class D beta-lactamase OXA-181	core	AMR	AMR	BETA-LACTAM	CARBAPENEM	ALLELEX	265	265	100	100	265	WP_015060052.1	OXA-48 family carbapenem-hydrolyzing class D beta-lactamase OXA-181	NA	NA
KLPN_134_93075964	contig00074	128	922	+	plasmid_AA038	IncX3,rep_cluster_1195	conjugative	blaOXA-48-family	blaOXA-181	OXA-48 family carbapenem-hydrolyzing class D beta-lactamase OXA-181	core	AMR	AMR	BETA-LACTAM	CARBAPENEM	ALLELEX	265	265	100	100	265	WP_015060052.1	OXA-48 family carbapenem-hydrolyzing class D beta-lactamase OXA-181	NA	NA
KLPN_134_93075964	contig00086	225	1034	+	plasmid_AA449	IncFII,rep_cluster_1418,rep_cluster_2183	conjugative	blaNDM	blaNDM-4	subclass B1 metallo-beta-lactamase NDM-4	core	AMR	AMR	BETA-LACTAM	CARBAPENEM	ALLELEX	270	270	100	100	270	WP_063860861.1	subclass B1 metallo-beta-lactamase NDM-4	NA	NA
KLPN_135_93080257	contig00071	128	922	+	plasmid_AA038	IncX3,rep_cluster_1195	conjugative	blaOXA-48-family	blaOXA-181	OXA-48 family carbapenem-hydrolyzing class D beta-lactamase OXA-181	core	AMR	AMR	BETA-LACTAM	CARBAPENEM	ALLELEX	265	265	100	100	265	WP_015060052.1	OXA-48 family carbapenem-hydrolyzing class D beta-lactamase OXA-181	NA	NA
KLPN_135_93080257	contig00086	225	1034	+	plasmid_AA449	IncFII,rep_cluster_1418,rep_cluster_2183	conjugative	blaNDM	blaNDM-4	subclass B1 metallo-beta-lactamase NDM-4	core	AMR	AMR	BETA-LACTAM	CARBAPENEM	ALLELEX	270	270	100	100	270	WP_063860861.1	subclass B1 metallo-beta-lactamase NDM-4	NA	NA
KLPN_136_93028447	contig00083	6695	7504	-	plasmid_AA450	IncFII,rep_cluster_1418	conjugative	blaNDM	blaNDM-4	subclass B1 metallo-beta-lactamase NDM-4	core	AMR	AMR	BETA-LACTAM	CARBAPENEM	ALLELEX	270	270	100	100	270	WP_063860861.1	subclass B1 metallo-beta-lactamase NDM-4	NA	NA
KLPN_137_93036051	contig00068	128	922	+	plasmid_AA038	IncX3,rep_cluster_1195	conjugative	blaOXA-48-family	blaOXA-181	OXA-48 family carbapenem-hydrolyzing class D beta-lactamase OXA-181	core	AMR	AMR	BETA-LACTAM	CARBAPENEM	ALLELEX	265	265	100	100	265	WP_015060052.1	OXA-48 family carbapenem-hydrolyzing class D beta-lactamase OXA-181	NA	NA
KLPN_137_93036051	contig00072	6699	7508	-	plasmid_AC125	IncFIB	non-mobilizable	blaNDM	blaNDM-4	subclass B1 metallo-beta-lactamase NDM-4	core	AMR	AMR	BETA-LACTAM	CARBAPENEM	ALLELEX	270	270	100	100	270	WP_063860861.1	subclass B1 metallo-beta-lactamase NDM-4	NA	NA
KLPN_138_93026726	contig00092	408	1286	+	plasmid_AA359	IncU	non-mobilizable	blaKPC	blaKPC-2	carbapenem-hydrolyzing class A beta-lactamase KPC-2	core	AMR	AMR	BETA-LACTAM	CARBAPENEM	ALLELEX	293	293	100	100	293	WP_004199234.1	carbapenem-hydrolyzing class A beta-lactamase KPC-2	NA	NA
KLPN_139_93084149	contig00073	6702	7511	-	plasmid_AA450	IncFII,rep_cluster_1418,rep_cluster_2183	conjugative	blaNDM	blaNDM-4	subclass B1 metallo-beta-lactamase NDM-4	core	AMR	AMR	BETA-LACTAM	CARBAPENEM	ALLELEX	270	270	100	100	270	WP_063860861.1	subclass B1 metallo-beta-lactamase NDM-4	NA	NA
KLPN_139_93084149	contig00071	2282	3076	+	plasmid_AA977	Col156	mobilizable	blaOXA-48-family	blaOXA-48	OXA-48 family carbapenem-hydrolyzing class D beta-lactamase OXA-48	core	AMR	AMR	BETA-LACTAM	CARBAPENEM	ALLELEX	265	265	100	100	265	WP_015059991.1	OXA-48 family carbapenem-hydrolyzing class D beta-lactamase OXA-48	NA	NA
KLPN_140_93084714	contig00073	128	922	+	plasmid_AA038	IncX3,rep_cluster_1195	conjugative	blaOXA-48-family	blaOXA-181	OXA-48 family carbapenem-hydrolyzing class D beta-lactamase OXA-181	core	AMR	AMR	BETA-LACTAM	CARBAPENEM	ALLELEX	265	265	100	100	265	WP_015060052.1	OXA-48 family carbapenem-hydrolyzing class D beta-lactamase OXA-181	NA	NA
KLPN_140_93084714	contig00084	223	1032	+	plasmid_AC125	IncFIB	non-mobilizable	blaNDM	blaNDM-4	subclass B1 metallo-beta-lactamase NDM-4	core	AMR	AMR	BETA-LACTAM	CARBAPENEM	ALLELEX	270	270	100	100	270	WP_063860861.1	subclass B1 metallo-beta-lactamase NDM-4	NA	NA
KLPN_141_93084430	contig00073	4030	4824	+	plasmid_AA038	IncX3,rep_cluster_1195	conjugative	blaOXA-48-family	blaOXA-181	OXA-48 family carbapenem-hydrolyzing class D beta-lactamase OXA-181	core	AMR	AMR	BETA-LACTAM	CARBAPENEM	ALLELEX	265	265	100	100	265	WP_015060052.1	OXA-48 family carbapenem-hydrolyzing class D beta-lactamase OXA-181	NA	NA
KLPN_142_93087172	contig00084	6700	7509	-	chromosome			blaNDM	blaNDM-4	subclass B1 metallo-beta-lactamase NDM-4	core	AMR	AMR	BETA-LACTAM	CARBAPENEM	ALLELEX	270	270	100	100	270	WP_063860861.1	subclass B1 metallo-beta-lactamase NDM-4	NA	NA
KLPN_143_93088530	contig00083	408	1286	+	plasmid_AA359	IncU	non-mobilizable	blaKPC	blaKPC-2	carbapenem-hydrolyzing class A beta-lactamase KPC-2	core	AMR	AMR	BETA-LACTAM	CARBAPENEM	ALLELEX	293	293	100	100	293	WP_004199234.1	carbapenem-hydrolyzing class A beta-lactamase KPC-2	NA	NA
KLPN_144_93069139	contig00066	4058	4852	+	plasmid_AA038	IncX3,rep_cluster_1195	conjugative	blaOXA-48-family	blaOXA-181	OXA-48 family carbapenem-hydrolyzing class D beta-lactamase OXA-181	core	AMR	AMR	BETA-LACTAM	CARBAPENEM	ALLELEX	265	265	100	100	265	WP_015060052.1	OXA-48 family carbapenem-hydrolyzing class D beta-lactamase OXA-181	NA	NA
KLPN_144_93069139	contig00109	226	1035	+	plasmid_AE583	IncFII,rep_cluster_2183	mobilizable	blaNDM	blaNDM-4	subclass B1 metallo-beta-lactamase NDM-4	core	AMR	AMR	BETA-LACTAM	CARBAPENEM	ALLELEX	270	270	100	100	270	WP_063860861.1	subclass B1 metallo-beta-lactamase NDM-4	NA	NA
KLPN_145_93069496	contig00073	6702	7511	-	plasmid_AA450	IncFII,rep_cluster_1418,rep_cluster_2183	conjugative	blaNDM	blaNDM-4	subclass B1 metallo-beta-lactamase NDM-4	core	AMR	AMR	BETA-LACTAM	CARBAPENEM	ALLELEX	270	270	100	100	270	WP_063860861.1	subclass B1 metallo-beta-lactamase NDM-4	NA	NA
KLPN_145_93069496	contig00072	2282	3076	+	plasmid_AA977	Col156	mobilizable	blaOXA-48-family	blaOXA-48	OXA-48 family carbapenem-hydrolyzing class D beta-lactamase OXA-48	core	AMR	AMR	BETA-LACTAM	CARBAPENEM	ALLELEX	265	265	100	100	265	WP_015059991.1	OXA-48 family carbapenem-hydrolyzing class D beta-lactamase OXA-48	NA	NA
KLPN_146_93070193	contig00068	373	1167	+	plasmid_AA038	IncX3,rep_cluster_1195	conjugative	blaOXA-48-family	blaOXA-181	OXA-48 family carbapenem-hydrolyzing class D beta-lactamase OXA-181	core	AMR	AMR	BETA-LACTAM	CARBAPENEM	ALLELEX	265	265	100	100	265	WP_015060052.1	OXA-48 family carbapenem-hydrolyzing class D beta-lactamase OXA-181	NA	NA
KLPN_147_93071255	contig00069	6701	7510	-	chromosome			blaNDM	blaNDM-4	subclass B1 metallo-beta-lactamase NDM-4	core	AMR	AMR	BETA-LACTAM	CARBAPENEM	ALLELEX	270	270	100	100	270	WP_063860861.1	subclass B1 metallo-beta-lactamase NDM-4	NA	NA
KLPN_148_93088334	contig00083	6701	7510	-	plasmid_AA450	IncFII,rep_cluster_1418,rep_cluster_2183	conjugative	blaNDM	blaNDM-4	subclass B1 metallo-beta-lactamase NDM-4	core	AMR	AMR	BETA-LACTAM	CARBAPENEM	ALLELEX	270	270	100	100	270	WP_063860861.1	subclass B1 metallo-beta-lactamase NDM-4	NA	NA
KLPN_149_93091445	contig00069	127	921	+	plasmid_AA038	IncX3,rep_cluster_1195	conjugative	blaOXA-48-family	blaOXA-181	OXA-48 family carbapenem-hydrolyzing class D beta-lactamase OXA-181	core	AMR	AMR	BETA-LACTAM	CARBAPENEM	ALLELEX	265	265	100	100	265	WP_015060052.1	OXA-48 family carbapenem-hydrolyzing class D beta-lactamase OXA-181	NA	NA
KLPN_149_93091445	contig00082	225	1034	+	plasmid_AA038	IncX3,rep_cluster_1195	conjugative	blaNDM	blaNDM-4	subclass B1 metallo-beta-lactamase NDM-4	core	AMR	AMR	BETA-LACTAM	CARBAPENEM	ALLELEX	270	270	100	100	270	WP_063860861.1	subclass B1 metallo-beta-lactamase NDM-4	NA	NA
KLPN_150_93059933	contig00094	1365	2243	+	chromosome			blaKPC	blaKPC-2	carbapenem-hydrolyzing class A beta-lactamase KPC-2	core	AMR	AMR	BETA-LACTAM	CARBAPENEM	ALLELEX	293	293	100	100	293	WP_004199234.1	carbapenem-hydrolyzing class A beta-lactamase KPC-2	NA	NA
KLPN_150_93059933	contig00069	4062	4856	+	plasmid_AA038	IncX3,rep_cluster_1195,rep_cluster_2327	conjugative	blaOXA-48-family	blaOXA-181	OXA-48 family carbapenem-hydrolyzing class D beta-lactamase OXA-181	core	AMR	AMR	BETA-LACTAM	CARBAPENEM	ALLELEX	265	265	100	100	265	WP_015060052.1	OXA-48 family carbapenem-hydrolyzing class D beta-lactamase OXA-181	NA	NA
KLPN_150_93059933	contig00091	580	1389	+	plasmid_AA338	IncFIA,IncFIC	conjugative	blaNDM	blaNDM-5	subclass B1 metallo-beta-lactamase NDM-5	core	AMR	AMR	BETA-LACTAM	CARBAPENEM	ALLELEX	270	270	100	100	270	WP_023408309.1	subclass B1 metallo-beta-lactamase NDM-5	NA	NA
KLPN_151_93060771	contig00066	4062	4856	+	plasmid_AA038	IncX3,rep_cluster_1195	conjugative	blaOXA-48-family	blaOXA-181	OXA-48 family carbapenem-hydrolyzing class D beta-lactamase OXA-181	core	AMR	AMR	BETA-LACTAM	CARBAPENEM	ALLELEX	265	265	100	100	265	WP_015060052.1	OXA-48 family carbapenem-hydrolyzing class D beta-lactamase OXA-181	NA	NA
KLPN_152_93060806	contig00094	4060	4854	+	plasmid_AA038	IncX3,rep_cluster_1195	conjugative	blaOXA-48-family	blaOXA-181	OXA-48 family carbapenem-hydrolyzing class D beta-lactamase OXA-181	core	AMR	AMR	BETA-LACTAM	CARBAPENEM	ALLELEX	265	265	100	100	265	WP_015060052.1	OXA-48 family carbapenem-hydrolyzing class D beta-lactamase OXA-181	NA	NA
