# Supplementary material for: Carbapenemase Genotypes in Carbapenem-Resistant Enterobacterales (CRE) from Clinical Isolates in Southern Vietnam (2023): A Whole Genome Sequencing Analysis
Source: Research Square preprint supplement (doi:10.21203/rs.3.rs-6195495/v1), 2025-03-17
Supplement: Supplementary file 2 [file 9a7c763a64fa086e68bef5b1.xlsx]

## Sheet: Metadata of study
No.	Collection samples Day	Lab ID	Final_research_code	Patient	Gender	Age	Department	Group of department	Sample	Group of sample	Underlying conditions	Type of Infections	Bacteria	Multi Locus Sequnce Type (MLST)	Numbers of CPGs	Group of CPGs	Variants of CPGs	Ertapenem-MIC	Ertapenem-Interpretation	Imipenem-MIC	Imipenem-Interpretation	Meropenem-MIC	Meropenem-Interpretation
1	13/03/2023 23:06	93021342	ENCL_001_93021342	VM-006	M	40	Neurosurgery	Surgery	Blood	Blood	Cerebrovascular disease, Surgical operation	Bloodstream infection	Enterobacter cloacae complex	ST1497	1 gene	blaNDM	blaNDM-1	4	R	4	R	>=16	R
2	31/03/2023 13:24	93028925	ENCL_002_93028925	LX-048	M	67	Orthopedics	Surgery	Urine	Urine	No information	Urinary tract infection	Enterobacter cloacae complex	ST171	1 gene	blaNDM	blaNDM-1	>=8	R	>=16	R	>=16	R
3	04/04/2023 10:06	93030217	ENCL_003_93030217	VC-061	F	73	Orthopedics	Surgery	Pus (wound)	Pus/ Inflammation fluid	No information	Skin and soft tissue infections	Enterobacter cloacae complex	ST109	1 gene	blaNDM	blaNDM-1	>=8	R	>=16	R	>=16	R
4	13/04/2023 09:32	93034307	ENCL_004_93034307	NT-080	M	23	Orthopedics	Surgery	Pus (wound)	Pus/ Inflammation fluid	No information	Skin and soft tissue infections	Enterobacter cloacae complex	ST171	1 gene	blaNDM	blaNDM-1	>=8	R	8	R	>=16	R
5	25/04/2023 13:42	93039552	ENCL_005_93039552	NC-107	M	46	Neurology	Internal medicine	Urine	Urine	Cerebrovascular disease	Urinary tract infection	Enterobacter cloacae complex	ST109	1 gene	blaNDM	blaNDM-1	>=8	R	8	R	>=16	R
6	06/06/2023 06:01	93055710	ENCL_006_93055710	NV-168	M	25	Burn - Plastic Surgery	Surgery	Blood	Blood	Severe Burn	Bloodstream infection	Enterobacter cloacae complex	ST1718	1 gene	blaNDM	blaNDM-1	4	R	>=16	R	>=16	R
7	20/06/2023 10:39	93061852	ENCL_007_93061852	TN-181	F	64	Head Injury	Surgery	Sputum	Sputum/ BAL	Cerebrovascular disease	Pneumonia	Enterobacter cloacae complex	ST109	1 gene	blaNDM	blaNDM-1	>=8	R	>=16	R	>=16	R
8	29/07/2023 16:14	93079407	ENCL_008_93079407	HT-195	M	23	Neurosurgery Intensive Care	Intensive care unit	Pus (wound)	Pus/ Inflammation fluid	Cerebrovascular disease	Skin and soft tissue infections	Enterobacter cloacae complex	ST145	1 gene	blaNDM	blaNDM-1	>=8	R	8	R	>=16	R
9	10/02/2023 13:43	93008360	ESCO_001_93008360	ND-001	M	66	Hepatobiliary and Pancreas Surgery	Surgery	Blood	Blood	Biliary tract disease	Bloodstream infection	Escherichia coli	ST410	1 gene	blaOXA-48-family	blaOXA-181	>=8	R	2	I	2	I
10	17/03/2023 09:06	93022838	ESCO_002_93022838	HN-009	F	58	Rheumatology	Internal medicine	Urine	Urine	Diabetes, Others	Urinary tract infection	Escherichia coli	ST410	2 genes	blaNDM, blaOXA-48-family	blaNDM-5, blaOXA-181	>=8	R	>=16	R	>=16	R
11	17/03/2023 17:29	93023101	ESCO_003_93023101	LC-012	F	80	Intensive Care D	Intensive care unit	Blood	Blood	Cerebrovascular disease, Sepic shock, Diabetes	Bloodstream infection	Escherichia coli	ST131	1 gene	blaOXA-48-family	blaOXA-48	2	R	1	S	4	R
12	18/03/2023 07:01	93023242	ESCO_004_93023242	TT-014	M	88	Lung	Internal medicine	Sputum	Sputum/ BAL	No information	Pneumonia	Escherichia coli	ST405	1 gene	blaOXA-48-family	blaOXA-181	>=8	R	0.5	S	1	S
13	20/03/2023 07:31	93023649	ESCO_005_93023649	NC-016	M	48	Haematology	Internal medicine	Blood	Blood	Haematology disease	Bloodstream infection	Escherichia coli	ST405	1 gene	blaOXA-48-family	blaOXA-48	>=8	R	<=0.25	S	1	S
14	22/03/2023 02:20	93024642	ESCO_006_93024642	NS-018	F	65	Ophthalmalogy	Surgery	Intraocular fluid	Pus/ Inflammation fluid	No information	Conjunctivitis	Escherichia coli	ST38	1 gene	blaOXA-48-family	blaOXA-48	4	R	2	I	2	I
15	28/03/2023 16:51	93027569	ESCO_007_93027569	NH-036	M	62	Neurology	Internal medicine	Bronchoalveolar lavage	Sputum/ BAL	Cerebrovascular disease	Pneumonia	Escherichia coli	ST361	2 genes	blaNDM, blaOXA-48-family	blaNDM-5, blaOXA-181	>=8	R	>=16	R	>=16	R
16	30/03/2023 06:00	93028236	ESCO_008_93028236	LD-039	M	27	Tropical Disease	Internal medicine	Blood	Blood	Sepic shock	Bloodstream infection	Escherichia coli	ST457	1 gene	blaOXA-48-family	blaOXA-48	>=8	R	>=16	R	>=16	R
17	30/03/2023 10:17	93028357	ESCO_009_93028357	PL-040	M	73	Nephrology	Internal medicine	Blood	Blood	Diabetes, Haematology disease, Kidney disease	Bloodstream infection	Escherichia coli	ST410	1 gene	blaNDM	blaNDM-5	>=8	R	>=16	R	>=16	R
18	30/03/2023 15:20	93028548	ESCO_010_93028548	HT-043	M	61	Cardiology	Internal medicine	Sputum	Sputum/ BAL	No information	Pneumonia	Escherichia coli	ST410	1 gene	blaOXA-48-family	blaOXA-484	4	R	<=0.25	S	0.5	S
19	01/04/2023 14:15	93029309	ESCO_011_93029309	NR-052	M	89	Lung	Internal medicine	Sputum	Sputum/ BAL	No information	Pneumonia	Escherichia coli	ST410	2 genes	blaNDM, blaOXA-48-family	blaNDM-5, blaOXA-181	>=8	R	>=16	R	>=16	R
20	31/03/2023 10:26	93028824	ESCO_012_93028824	TT-046	F	62	Burn - Plastic Surgery	Surgery	Pus (wound)	Pus/ Inflammation fluid	Severe Burn	Skin and soft tissue infections	Escherichia coli	ST648	No gene	No gene	No gene	4	R	<=0.25	S	1	S
21	24/03/2023 14:41	93025960	ESCO_013_93025960	NT-022	M	60	Cardiology	Internal medicine	Sputum	Sputum/ BAL	Sepic shock	Pneumonia	Escherichia coli	ST131	1 gene	blaOXA-48-family	blaOXA-181	2	R	<=0.25	S	<=0.25	S
22	04/04/2023 12:53	93030309	ESCO_014_93030309	TT-062	M	74	Hepatobiliary and Pancreas Surgery	Surgery	Bile	Pus/ Inflammation fluid	Biliary tract disease	Abdominal infection	Escherichia coli	ST410	1 gene	blaNDM	blaNDM-5	>=8	R	>=16	R	>=16	R
23	03/04/2023 10:21	93029726	ESCO_015_93029726	PT-054	F	91	Nephrology	Internal medicine	Blood	Blood	No information	Bloodstream infection	Escherichia coli	ST3529	1 gene	blaOXA-48-family	blaOXA-48	2	R	1	S	2	I
24	09/04/2023 14:22	93032460	ESCO_016_93032460	PH-069	F	77	Hepatobiliary and Pancreas Surgery	Surgery	Bile	Pus/ Inflammation fluid	No information	Skin and soft tissue infections	Escherichia coli	ST410	No gene	No gene	No gene	4	R	0.5	S	1	S
25	11/04/2023 15:17	93033501	ESCO_017_93033501	TH-077	F	50	Haematology	Internal medicine	Blood	Blood	Haematology disease	Bloodstream infection	Escherichia coli	ST361	No gene	No gene	No gene	4	R	1	S	1	S
26	14/04/2023 08:15	93034764	ESCO_018_93034764	NN-081	F	47	Palliative Care	Internal medicine	Blood	Blood	Cancer	Bloodstream infection	Escherichia coli	ST410	1 gene	blaOXA-48-family	blaOXA-484	4	R	2	I	0.5	S
27	18/04/2023 10:27	93036350	ESCO_019_93036350	NH-092	M	64	Urology	Surgery	Urine	Urine	Haematology disease, Others	Urinary tract infection	Escherichia coli	ST1722	No gene	No gene	No gene	1	I	<=0.25	S	<=0.25	S
28	18/04/2023 14:21	93036498	ESCO_020_93036498	NT-094	M	17	Haematology	Internal medicine	Pus (wound)	Pus/ Inflammation fluid	Haematology disease	Skin and soft tissue infections	Escherichia coli	ST457	1 gene	blaOXA-48-family	blaOXA-181	4	R	2	I	1	S
29	15/04/2023 08:17	93035243	ESCO_021_93035243	VB-084	F	90	General Internal Medicine 9B1	Internal medicine	Urine	Urine	Cardiology disease, Kidney disease	Urinary tract infection	Escherichia coli	ST410	2 genes	blaNDM, blaOXA-48-family	blaNDM-5, blaOXA-181	>=8	R	>=16	R	>=16	R
30	29/04/2023 13:20	93041196	ESCO_022_93041196	DH-115	M	71	Tropical Disease	Internal medicine	Cerebrospinal fluid	Pus/ Inflammation fluid	No information	Meningitis	Escherichia coli	ST410	1 gene	blaNDM	blaNDM-5	>=8	R	>=16	R	>=16	R
31	27/04/2023 20:34	93040590	ESCO_023_93040590	NM-112	M	19	Tropical Disease	Internal medicine	Urine	Urine	No information	Urinary tract infection	Escherichia coli	ST405	1 gene	blaOXA-48-family	blaOXA-181	4	R	0.5	S	1	S
32	28/04/2023 21:51	93041033	ESCO_024_93041033	NH-114	M	44	Intensive Care	Intensive care unit	Blood	Blood	Cerebrovascular disease, Surgical operation, Kidney disease, Others	Bloodstream infection	Escherichia coli	ST167	1 gene	blaNDM	blaNDM-5	>=8	R	>=16	R	>=16	R
33	01/05/2023 23:36	93041644	ESCO_025_93041644	TL-117	F	53	Nephrology	Internal medicine	Blood	Blood	Sepic shock	Bloodstream infection	Escherichia coli	ST648	1 gene	blaNDM	blaNDM-5	>=8	R	>=16	R	>=16	R
34	24/04/2023 06:08	93038770	ESCO_026_93038770	CS-103	M	61	Urology	Surgery	Urine	Urine	No information	Urinary tract infection	Escherichia coli	ST1284	1 gene	blaNDM	blaNDM-5	>=8	R	>=16	R	>=16	R
35	06/05/2023 06:28	93043073	ESCO_027_93043073	KV-130	F	65	Tropical Disease	Internal medicine	Cerebrospinal fluid	Pus/ Inflammation fluid	No information	Meningitis	Escherichia coli	ST354	1 gene	blaOXA-48-family	blaOXA-48	>=8	R	2	I	4	R
36	09/05/2023 15:16	93044470	ESCO_028_93044470	LM-136	F	32	Palliative Care	Internal medicine	Urine	Urine	Cancer	Urinary tract infection	Escherichia coli	ST8346	2 genes	blaNDM, blaOXA-48-family	blaNDM (No specific gene), blaOXA-181	>=8	R	>=16	R	>=16	R
37	11/05/2023 11:15	93045262	ESCO_029_93045262	LL-140	M	59	Urology	Surgery	Urine	Urine	Kidney disease	Urinary tract infection	Escherichia coli	ST405	1 gene	blaNDM	blaNDM-5	>=8	R	>=16	R	>=16	R
38	12/05/2023 09:56	93045599	ESCO_030_93045599	LD-141	M	74	Urology	Surgery	Urine	Urine	Cancer	Urinary tract infection	Escherichia coli	ST410	No gene	No gene	No gene	4	R	<=0.25	S	0.5	S
39	17/05/2023 10:11	93047437	ESCO_031_93047437	HK-148	M	86	Urology	Surgery	Urine	Urine	Kidney disease	Urinary tract infection	Escherichia coli	ST410	1 gene	blaNDM	blaNDM-5	>=8	R	>=16	R	>=16	R
40	25/05/2023 09:38	93050872	ESCO_032_93050872	TT-159	M	75	Nephrology	Internal medicine	Urine	Urine	No information	Urinary tract infection	Escherichia coli	ST410	1 gene	blaOXA-48-family	blaOXA-181	4	R	2	I	1	S
41	31/05/2023 14:41	93053533	ESCO_033_93053533	TH-165	F	65	Nephrology	Internal medicine	Blood	Blood	Diabetes, Kidney disease	Bloodstream infection	Escherichia coli	ST405	1 gene	blaOXA-48-family	blaOXA-181	>=8	R	<=0.25	S	1	S
42	23/05/2023 14:48	93050038	ESCO_034_93050038	NP-157	F	80	Intensive Care D	Intensive care unit	Blood	Blood	Sepic shock, Kidney disease	Bloodstream infection	Escherichia coli	ST405	1 gene	blaOXA-48-family	blaOXA-181	>=8	R	>=16	R	>=16	R
43	07/06/2023 05:17	93056196	ESCO_035_93056196	KD-170	M	56	Nephrology	Internal medicine	Blood	Blood	Kidney disease	Bloodstream infection	Escherichia coli	ST410	No gene	No gene	No gene	2	R	2	I	<=0.25	S
44	10/02/2023 23:17	93008594	KLPN_001_93008594	NN-002	F	24	Burn - Plastic Surgery	Surgery	Blood	Blood	Severe Burn	Bloodstream infection	Klebsiella pneumoniae	ST16	2 genes	blaNDM, blaOXA-48-family	blaNDM-4, blaOXA-181	>=8	R	>=16	R	>=16	R
45	01/03/2023 03:18	93016208	KLPN_002_93016208	LS-004	F	59	Intensive Care	Intensive care unit	Sputum	Sputum/ BAL	Kidney disease, Surgical operation, Others	Pneumonia	Klebsiella pneumoniae	ST147	1 gene	blaOXA-48-family	blaOXA-181	>=8	R	>=16	R	>=16	R
46	14/02/2023 17:47	93010056	KLPN_003_93010056	UP-003	M	52	Intensive Care	Intensive care unit	Blood	Blood	Kidney transplantation, Cerebrovascular disease, Kidney disease	Bloodstream infection	Klebsiella pneumoniae	ST16	2 genes	blaNDM, blaOXA-48-family	blaNDM-4, blaOXA-48	>=8	R	>=16	R	>=16	R
47	07/03/2023 10:41	93018760	KLPN_004_93018760	VP-005	M	48	Intensive Care	Intensive care unit	Pus (wound)	Pus/ Inflammation fluid	Surgical operation	Skin and soft tissue infections	Klebsiella pneumoniae	ST16	2 genes	blaNDM, blaOXA-48-family	blaNDM-4, blaOXA-48	>=8	R	>=16	R	>=16	R
48	16/03/2023 13:52	93022583	KLPN_005_93022583	NN-008	F	32	Intensive Care	Intensive care unit	Sputum	Sputum/ BAL	Cardiology disease, Surgical operation, Kidney disease, Others	Pneumonia	Klebsiella pneumoniae	ST5815	1 gene	blaKPC	blaKPC-2	>=8	R	>=16	R	>=16	R
49	17/03/2023 09:28	93022848	KLPN_006_93022848	NT-010	F	71	Nephrology	Internal medicine	Urine	Urine	No information	Urinary tract infection	Klebsiella pneumoniae	ST16	2 genes	blaNDM, blaOXA-48-family	blaNDM-4, blaOXA-181	>=8	R	>=16	R	>=16	R
50	17/03/2023 16:02	93023074	KLPN_007_93023074	NT-011	M	56	Palliative Care	Internal medicine	Sputum	Sputum/ BAL	Cancer	Pneumonia	Klebsiella pneumoniae	ST5815	2 genes	blaKPC, blaOXA-48-family	blaKPC-2, blaOXA-181	>=8	R	>=16	R	>=16	R
51	18/03/2023 03:28	93023212	KLPN_008_93023212	PT-013	M	57	Endocrinology	Internal medicine	Sputum	Sputum/ BAL	Diabetes	Pneumonia	Klebsiella pneumoniae	ST16	2 genes	blaNDM, blaOXA-48-family	blaNDM (No specific gene), blaOXA-181	>=8	R	>=16	R	>=16	R
52	18/03/2023 07:01	93023243	KLPN_009_93023243	NA-015	M	87	Lung	Internal medicine	Sputum	Sputum/ BAL	No information	Pneumonia	Klebsiella pneumoniae	ST16	2 genes	blaNDM, blaOXA-48-family	blaNDM-4, blaOXA-181	>=8	R	>=16	R	>=16	R
53	14/03/2023 08:11	93021441	KLPN_010_93021441	ND-007	F	74	Cardiology	Internal medicine	Blood	Blood	Cardiology disease, Diabetes	Bloodstream infection	Klebsiella pneumoniae	ST16	2 genes	blaNDM, blaOXA-48-family	blaNDM-4, blaOXA-181	>=8	R	>=16	R	>=16	R
54	21/03/2023 15:20	93024520	KLPN_011_93024520	DN-017	M	61	Endocrinology	Internal medicine	Pus (wound)	Pus/ Inflammation fluid	Diabetes	Skin and soft tissue infections	Klebsiella pneumoniae	ST16	2 genes	blaNDM, blaOXA-48-family	blaNDM-4, blaOXA-181	>=8	R	>=16	R	>=16	R
55	23/03/2023 14:54	93025496	KLPN_012_93025496	NB-020	M	62	Endocrinology	Internal medicine	Pus (wound)	Pus/ Inflammation fluid	Diabetes	Skin and soft tissue infections	Klebsiella pneumoniae	ST16	2 genes	blaNDM, blaOXA-48-family	blaNDM-4, blaOXA-181	>=8	R	>=16	R	>=16	R
56	23/03/2023 10:10	93025277	KLPN_013_93025277	MD-019	M	62	Lung	Internal medicine	Pus (wound)	Pus/ Inflammation fluid	No information	Skin and soft tissue infections	Klebsiella pneumoniae	ST16	2 genes	blaNDM, blaOXA-48-family	blaNDM-4, blaOXA-181	>=8	R	>=16	R	>=16	R
57	24/03/2023 10:38	93025765	KLPN_014_93025765	NH-021	M	53	Endocrinology	Internal medicine	Pus (wound)	Pus/ Inflammation fluid	Diabetes	Skin and soft tissue infections	Klebsiella pneumoniae	ST147	1 gene	blaNDM	blaNDM-5	>=8	R	>=16	R	>=16	R
58	25/03/2023 05:14	93026130	KLPN_015_93026130	HC-023	F	73	Urology	Surgery	Urine	Urine	No information	Urinary tract infection	Klebsiella pneumoniae	ST16	2 genes	blaNDM, blaOXA-48-family	blaNDM-4, blaOXA-181	>=8	R	>=16	R	>=16	R
59	25/03/2023 07:40	93026150	KLPN_016_93026150	DD-025	M	63	Haematology	Internal medicine	Sputum	Sputum/ BAL	Cancer	Pneumonia	Klebsiella pneumoniae	ST16	2 genes	blaNDM, blaOXA-48-family	blaNDM-4, blaOXA-181	>=8	R	>=16	R	>=16	R
60	25/03/2023 18:35	93026300	KLPN_017_93026300	NT-026	M	75	Interventional Cardiology	Internal medicine	Sputum	Sputum/ BAL	Cardiology disease	Pneumonia	Klebsiella pneumoniae	ST147	1 gene	blaNDM	blaNDM-4	>=8	R	>=16	R	8	R
61	26/03/2023 10:46	93026436	KLPN_018_93026436	NL-028	F	80	Intensive Care D	Intensive care unit	Catheter	Pus/ Inflammation fluid	Sepic shock, Haematology disease, Kidney disease, Liver disease	Catheter	Klebsiella pneumoniae	ST16	2 genes	blaNDM, blaOXA-48-family	blaNDM-4, blaOXA-181	>=8	R	>=16	R	>=16	R
62	25/03/2023 06:28	93026140	KLPN_019_93026140	LC-024	F	79	Hepatobiliary and Pancreas Surgery	Surgery	Bile	Pus/ Inflammation fluid	No information	Abdominal infection	Klebsiella pneumoniae	ST16	1 gene	blaOXA-48-family	blaOXA-181	>=8	R	2	I	>=16	R
63	26/03/2023 07:57	93026402	KLPN_020_93026402	LC-027	M	77	Haematology	Internal medicine	Sputum	Sputum/ BAL	Sepic shock, Haematology disease	Pneumonia	Klebsiella pneumoniae	ST11	1 gene	blaKPC	blaKPC-2	>=8	R	>=16	R	>=16	R
64	26/03/2023 18:09	93026496	KLPN_021_93026496	LN-030	M	88	Interventional Cardiology	Internal medicine	Urine	Urine	Cardiology disease	Urinary tract infection	Klebsiella pneumoniae	ST16	2 genes	blaNDM, blaOXA-48-family	blaNDM-4, blaOXA-181	>=8	R	>=16	R	>=16	R
65	27/03/2023 07:04	93026626	KLPN_022_93026626	NN-031	M	67	Intensive Care D	Intensive care unit	Sputum	Sputum/ BAL	Cardiology disease, Sepic shock, Diabetes, Kidney disease	Pneumonia	Klebsiella pneumoniae	ST11	1 gene	blaKPC	blaKPC-2	>=8	R	>=16	R	>=16	R
66	27/03/2023 10:21	93026715	KLPN_023_93026715	LV-032	F	58	Intensive Care	Intensive care unit	Sputum	Sputum/ BAL	No information	Pneumonia	Klebsiella pneumoniae	ST5815	1 gene	blaKPC	blaKPC-2	>=8	R	>=16	R	>=16	R
67	26/03/2023 16:08	93026486	KLPN_024_93026486	NM-029	F	57	Hepatobiliary and Pancreas Surgery	Surgery	Abdominal fluid	Pus/ Inflammation fluid	Cancer	Abdominal infection	Klebsiella pneumoniae	ST5815	1 gene	blaKPC	blaKPC-2	>=8	R	>=16	R	>=16	R
68	28/03/2023 13:31	93027404	KLPN_025_93027404	HT-034	M	61	Lung	Internal medicine	Sputum	Sputum/ BAL	No information	Pneumonia	Klebsiella pneumoniae	ST5815	1 gene	blaKPC	blaKPC-2	>=8	R	>=16	R	>=16	R
69	28/03/2023 14:15	93027452	KLPN_026_93027452	LT-035	F	67	Neurology	Internal medicine	Sputum	Sputum/ BAL	Diabetes	Pneumonia	Klebsiella pneumoniae	ST5815	1 gene	blaKPC	blaKPC-2	>=8	R	8	R	>=16	R
70	29/03/2023 10:37	93027820	KLPN_027_93027820	ND-037	M	71	Hepatobiliary and Pancreas Surgery	Surgery	Blood	Blood	Cancer	Bloodstream infection	Klebsiella pneumoniae	ST16	2 genes	blaNDM, blaOXA-48-family	blaNDM-4, blaOXA-181	>=8	R	8	R	>=16	R
71	30/03/2023 13:57	93028497	KLPN_028_93028497	PH-042	M	52	Neurosurgery	Surgery	Sputum	Sputum/ BAL	Cancer	Pneumonia	Klebsiella pneumoniae	ST656	1 gene	blaNDM	blaNDM-4	>=8	R	>=16	R	>=16	R
72	30/03/2023 18:47	93028623	KLPN_029_93028623	LT-044	F	53	Digestive Surgery	Surgery	Abdominal fluid	Pus/ Inflammation fluid	Surgical operation	Abdominal infection	Klebsiella pneumoniae	ST378	2 genes	blaNDM, blaOXA-48-family	blaNDM-4, blaOXA-48	>=8	R	>=16	R	>=16	R
73	31/03/2023 09:20	93028768	KLPN_030_93028768	LN-045	F	35	Urology	Surgery	Blood	Blood	Kidney transplantation	Bloodstream infection	Klebsiella pneumoniae	ST5815	1 gene	blaKPC	blaKPC-2	>=8	R	>=16	R	>=16	R
74	01/04/2023 01:10	93029167	KLPN_031_93029167	TP-050	M	64	Palliative Care	Internal medicine	Blood	Blood	Cancer	Bloodstream infection	Klebsiella pneumoniae	ST16	No gene	No gene	No gene	>=8	R	>=16	R	>=16	R
75	01/04/2023 09:31	93029239	KLPN_032_93029239	TU-051	F	66	Cardiology	Internal medicine	Sputum	Sputum/ BAL	Cardiology disease, Sepic shock	Pneumonia	Klebsiella pneumoniae	ST147	1 gene	blaOXA-48-family	blaOXA-181	>=8	R	>=16	R	>=16	R
76	01/04/2023 20:13	93029369	KLPN_033_93029369	VL-053	M	56	Palliative Care	Internal medicine	Blood	Blood	Cancer	Bloodstream infection	Klebsiella pneumoniae	ST16	2 genes	blaNDM, blaOXA-48-family	blaNDM-4, blaOXA-181	>=8	R	>=16	R	>=16	R
77	29/03/2023 19:47	93028116	KLPN_034_93028116	NM-038	F	58	Neurosurgery	Surgery	Blood	Blood	Cancer, Diabetes	Bloodstream infection	Klebsiella pneumoniae	ST709	1 gene	blaNDM	blaNDM-4	>=8	R	8	R	>=16	R
78	31/03/2023 17:31	93029057	KLPN_035_93029057	LT-049	M	33	Cardiology - Cardiac dysrhythmia	Internal medicine	Sputum	Sputum/ BAL	Cardiology disease	Pneumonia	Klebsiella pneumoniae	ST147	1 gene	blaOXA-48-family	blaOXA-48	>=8	R	2	I	4	R
79	03/04/2023 12:04	93029797	KLPN_036_93029797	NR-055	M	73	Hepatobiliary and Pancreas Surgery	Surgery	Peritoneal fluid	Pus/ Inflammation fluid	Cancer	Abdominal infection	Klebsiella pneumoniae	No ST predicted	1 gene	blaNDM	blaNDM (No specific gene)	>=8	R	>=16	R	>=16	R
80	03/04/2023 18:58	93030059	KLPN_037_93030059	PN-058	F	37	Intensive Care	Intensive care unit	Pus (wound)	Pus/ Inflammation fluid	Sepic shock, Surgical operation, Others	Skin and soft tissue infections	Klebsiella pneumoniae	ST16	2 genes	blaNDM, blaOXA-48-family	blaNDM-4, blaOXA-181	>=8	R	>=16	R	>=16	R
81	03/04/2023 16:11	93030026	KLPN_038_93030026	HM-057	M	74	Endocrinology	Internal medicine	Urine	Urine	Diabetes	Urinary tract infection	Klebsiella pneumoniae	ST11	1 gene	blaKPC	blaKPC-2	>=8	R	>=16	R	>=16	R
82	04/04/2023 01:05	93030110	KLPN_039_93030110	TT-060	M	34	Hepatobiliary and Pancreas Surgery	Surgery	Pus (wound)	Pus/ Inflammation fluid	Others	Skin and soft tissue infections	Klebsiella pneumoniae	ST5815	1 gene	blaKPC	blaKPC-2	>=8	R	>=16	R	>=16	R
83	03/04/2023 23:56	93030107	KLPN_040_93030107	DH-059	F	50	Neurosurgery	Surgery	Pus (wound)	Pus/ Inflammation fluid	Diabetes, Surgical operation, Kidney disease	Skin and soft tissue infections	Klebsiella pneumoniae	ST16	2 genes	blaNDM, blaOXA-48-family	blaNDM-4, blaOXA-181	>=8	R	>=16	R	>=16	R
84	05/04/2023 11:20	93030827	KLPN_041_93030827	NN-064	M	64	Cardiac Surgery	Surgery	Sputum	Sputum/ BAL	Cardiology disease	Pneumonia	Klebsiella pneumoniae	ST16	1 gene	blaOXA-48-family	blaOXA-181	>=8	R	8	R	>=16	R
85	04/04/2023 14:11	93030409	KLPN_042_93030409	NL-063	M	61	Intensive Care	Intensive care unit	Sputum	Sputum/ BAL	Liver disease	Pneumonia	Klebsiella pneumoniae	ST147	1 gene	blaOXA-48-family	blaOXA-181	<=0.5	S	2	I	1	S
86	06/04/2023 10:24	93031260	KLPN_043_93031260	NH-065	F	39	Urology	Surgery	Urine	Urine	Cancer	Urinary tract infection	Klebsiella pneumoniae	ST16	1 gene	blaNDM	blaNDM-4	>=8	R	>=16	R	>=16	R
87	06/04/2023 15:06	93031466	KLPN_044_93031466	NT-066	M	71	Hepatobiliary and Pancreas Surgery	Surgery	Bile	Pus/ Inflammation fluid	Surgical operation	Abdominal infection	Klebsiella pneumoniae	ST16	2 genes	blaNDM, blaOXA-48-family	blaNDM-4, blaOXA-181	>=8	R	>=16	R	>=16	R
88	07/04/2023 06:49	93031684	KLPN_045_93031684	VT-067	M	70	Neurology	Internal medicine	Sputum	Sputum/ BAL	Cerebrovascular disease	Pneumonia	Klebsiella pneumoniae	ST147	1 gene	blaOXA-48-family	blaOXA-181	4	R	1	S	2	I
89	10/04/2023 23:17	93033118	KLPN_046_93033118	TU-074	F	74	Neurology	Internal medicine	Sputum	Sputum/ BAL	Cerebrovascular disease, Cardiology disease	Pneumonia	Klebsiella pneumoniae	ST16	2 genes	blaNDM, blaOXA-48-family	blaNDM-4, blaOXA-181	>=8	R	>=16	R	>=16	R
90	11/04/2023 10:32	93033284	KLPN_047_93033284	TT-076	F	35	Neurosurgery	Surgery	Sputum	Sputum/ BAL	Cerebrovascular disease	Pneumonia	Klebsiella pneumoniae	ST5815	1 gene	blaKPC	blaKPC-2	>=8	R	>=16	R	>=16	R
91	09/04/2023 09:06	93032411	KLPN_048_93032411	ND-068	M	56	Haematology	Internal medicine	Sputum	Sputum/ BAL	Haematology disease	Pneumonia	Klebsiella pneumoniae	No ST predicted	2 genes	blaNDM, blaOXA-48-family	blaNDM-4, blaOXA-48	>=8	R	>=16	R	>=16	R
92	14/04/2023 08:50	93034778	KLPN_049_93034778	NT-082	M	70	Lung	Internal medicine	Blood	Blood	No information	Bloodstream infection	Klebsiella pneumoniae	ST16	1 gene	blaOXA-48-family	blaOXA-181	>=8	R	2	I	>=16	R
93	14/04/2023 15:35	93035042	KLPN_050_93035042	VB-083	M	42	Hepatobiliary and Pancreas Surgery	Surgery	Bile	Pus/ Inflammation fluid	Biliary tract disease	Abdominal infection	Klebsiella pneumoniae	ST378	1 gene	blaOXA-48-family	blaOXA-48	>=8	R	>=16	R	>=16	R
94	15/04/2023 09:16	93035249	KLPN_051_93035249	TX-085	F	83	Lung	Internal medicine	Urine	Urine	No information	Urinary tract infection	Klebsiella pneumoniae	ST5815	1 gene	blaKPC	blaKPC-2	>=8	R	8	R	>=16	R
95	16/04/2023 12:30	93035554	KLPN_052_93035554	TB-086	M	70	Urology	Surgery	Urine	Urine	Kidney disease	Urinary tract infection	Klebsiella pneumoniae	ST5815	1 gene	blaKPC	blaKPC-2	>=8	R	>=16	R	>=16	R
96	17/04/2023 14:18	93036004	KLPN_053_93036004	LV-087	M	41	Neurosurgery	Surgery	Sputum	Sputum/ BAL	Cerebrovascular disease	Pneumonia	Klebsiella pneumoniae	ST16	2 genes	blaNDM, blaOXA-48-family	blaNDM-4, blaOXA-181	>=8	R	>=16	R	>=16	R
97	17/04/2023 19:56	93036162	KLPN_054_93036162	NN-089	M	20	Intensive Care	Intensive care unit	Abdominal fluid	Pus/ Inflammation fluid	Surgical operation, Kidney disease, Others	Abdominal infection	Klebsiella pneumoniae	ST38	2 genes	blaNDM, blaOXA-48-family	blaNDM-4, blaOXA-48	>=8	R	>=16	R	>=16	R
98	18/04/2023 09:55	93036323	KLPN_055_93036323	NT-090	M	48	Rheumatology	Internal medicine	Pus (wound)	Pus/ Inflammation fluid	Diabetes	Skin and soft tissue infections	Klebsiella pneumoniae	ST147	1 gene	blaNDM	blaNDM (No specific gene)	>=8	R	>=16	R	>=16	R
99	18/04/2023 10:12	93036337	KLPN_056_93036337	PH-091	M	48	Digestive Surgery	Surgery	Pus (wound)	Pus/ Inflammation fluid	Surgical operation	Skin and soft tissue infections	Klebsiella pneumoniae	ST147	1 gene	blaKPC	blaKPC-2	>=8	R	>=16	R	>=16	R
100	18/04/2023 11:19	93036385	KLPN_057_93036385	HN-093	M	75	Endocrinology	Internal medicine	Pus (wound)	Pus/ Inflammation fluid	No information	Skin and soft tissue infections	Klebsiella pneumoniae	ST16	2 genes	blaNDM, blaOXA-48-family	blaNDM-4, blaOXA-181	>=8	R	>=16	R	>=16	R
101	19/04/2023 10:48	93036919	KLPN_058_93036919	PC-095	M	91	General Medicine 10B3	Internal medicine	Drainage fluid (Abdomen)	Pus/ Inflammation fluid	No information	Abdominal infection	Klebsiella pneumoniae	ST11	1 gene	blaKPC	blaKPC-2	>=8	R	>=16	R	>=16	R
102	19/04/2023 12:26	93036965	KLPN_059_93036965	TD-096	M	45	Tropical Disease	Internal medicine	Pus (wound)	Pus/ Inflammation fluid	Surgical operation, Kidney disease, Others	Skin and soft tissue infections	Klebsiella pneumoniae	ST11	1 gene	blaNDM	blaNDM-5	>=8	R	>=16	R	>=16	R
103	20/04/2023 11:57	93037451	KLPN_060_93037451	TN-098	F	37	Nephrology	Internal medicine	Pus (wound)	Pus/ Inflammation fluid	Kidney disease	Skin and soft tissue infections	Klebsiella pneumoniae	ST11	1 gene	blaKPC	blaKPC-2	>=8	R	>=16	R	>=16	R
104	20/04/2023 12:33	93037472	KLPN_061_93037472	BZ-099	F	28	Tropical Disease	Internal medicine	Urine	Urine	Cardiology disease, Kidney disease	Urinary tract infection	Klebsiella pneumoniae	ST16	2 genes	blaNDM, blaOXA-48-family	blaNDM-4, blaOXA-181	>=8	R	>=16	R	>=16	R
105	03/04/2023 13:09	93029832	KLPN_062_93029832	CP-056	F	43	Hepatobiliary and Pancreas Surgery	Surgery	Abdominal fluid	Pus/ Inflammation fluid	Surgical operation	Abdominal infection	Klebsiella pneumoniae	ST65	1 gene	blaNDM	blaNDM-4	>=8	R	>=16	R	>=16	R
106	20/04/2023 09:33	93037343	KLPN_063_93037343	NN-097	M	80	Palliative Care	Internal medicine	Blood	Blood	Cancer	Bloodstream infection	Klebsiella pneumoniae	ST16	1 gene	blaOXA-48-family	blaOXA-48	>=8	R	>=16	R	>=16	R
107	21/04/2023 11:31	93037908	KLPN_064_93037908	PQ-100	F	53	Orthopedics	Surgery	Blood	Blood	Surgical operation	Bloodstream infection	Klebsiella pneumoniae	ST5815	1 gene	blaKPC	blaKPC-2	>=8	R	>=16	R	>=16	R
108	11/04/2023 09:59	93033267	KLPN_065_93033267	KB-075	M	55	Endocrinology	Internal medicine	Pus (wound)	Pus/ Inflammation fluid	Diabetes	Skin and soft tissue infections	Klebsiella pneumoniae	ST16	1 gene	blaOXA-48-family	blaOXA-181	>=8	R	2	I	>=16	R
109	10/04/2023 10:28	93032728	KLPN_066_93032728	NB-070	F	73	Neurosurgery Intensive Care	Intensive care unit	Sputum	Sputum/ BAL	Cerebrovascular disease	Pneumonia	Klebsiella pneumoniae	ST5815	1 gene	blaKPC	blaKPC-2	>=8	R	>=16	R	>=16	R
110	10/04/2023 12:49	93032825	KLPN_067_93032825	LT-071	M	69	Tropical Disease	Internal medicine	Pus (wound)	Pus/ Inflammation fluid	Others	Skin and soft tissue infections	Klebsiella pneumoniae	ST16	2 genes	blaNDM, blaOXA-48-family	blaNDM-4, blaOXA-48	>=8	R	>=16	R	>=16	R
111	10/04/2023 16:05	93033000	KLPN_068_93033000	TC-073	F	30	Urology	Surgery	Urine	Urine	Cancer	Urinary tract infection	Klebsiella pneumoniae	ST16	2 genes	blaNDM, blaOXA-48-family	blaNDM-4, blaOXA-48	>=8	R	>=16	R	>=16	R
112	22/04/2023 23:36	93038480	KLPN_069_93038480	KM-102	M	15	Pediatric Cardiac Surgery	Surgery	Blood	Blood	Cardiology disease	Bloodstream infection	Klebsiella pneumoniae	ST147	2 genes	blaKPC, blaNDM	blaKPC-2, blaNDM-5	>=8	R	>=16	R	>=16	R
113	24/04/2023 15:13	93039143	KLPN_070_93039143	VL-105	F	64	Cardiology	Internal medicine	Drainage fluid (Wound)	Pus/ Inflammation fluid	Biliary tract disease, Kidney disease, Others	Skin and soft tissue infections	Klebsiella pneumoniae	ST16	1 gene	blaOXA-48-family	blaOXA-48	>=8	R	>=16	R	>=16	R
114	25/04/2023 15:09	93039599	KLPN_071_93039599	NQ-108	M	30	Haematology	Internal medicine	Blood	Blood	Haematology disease	Bloodstream infection	Klebsiella pneumoniae	ST16	2 genes	blaNDM, blaOXA-48-family	blaNDM-4, blaOXA-48	>=8	R	>=16	R	>=16	R
115	25/04/2023 18:59	93039668	KLPN_072_93039668	TT-110	M	46	Intensive Care	Intensive care unit	Sputum	Sputum/ BAL	Surgical operation, Kidney disease	Pneumonia	Klebsiella pneumoniae	ST5815	1 gene	blaKPC	blaKPC-2	>=8	R	>=16	R	>=16	R
116	26/04/2023 09:32	93039857	KLPN_073_93039857	CH-111	M	64	Burn - Plastic Surgery	Surgery	Sputum	Sputum/ BAL	Severe Burn	Pneumonia	Klebsiella pneumoniae	ST580	1 gene	blaNDM	blaNDM (No specific gene)	>=8	R	>=16	R	>=16	R
117	28/04/2023 15:54	93040952	KLPN_074_93040952	KH-113	F	25	Intensive Care	Intensive care unit	Abdominal fluid	Pus/ Inflammation fluid	Surgical operation	Abdominal infection	Klebsiella pneumoniae	ST16	2 genes	blaNDM, blaOXA-48-family	blaNDM (No specific gene), blaOXA-181	>=8	R	2	I	>=16	R
118	21/04/2023 13:44	93037994	KLPN_075_93037994	LS-101	M	57	Cardiology	Internal medicine	Blood	Blood	Cardiology disease	Bloodstream infection	Klebsiella pneumoniae	ST231	1 gene	blaOXA-48-family	blaOXA-232	>=8	R	4	R	>=16	R
119	24/04/2023 13:15	93039010	KLPN_076_93039010	ND-104	F	76	Cardiology	Internal medicine	Urine	Urine	Cardiology disease	Urinary tract infection	Klebsiella pneumoniae	ST16	2 genes	blaNDM, blaOXA-48-family	blaNDM (No specific gene), blaOXA-181	>=8	R	2	I	>=16	R
120	24/04/2023 19:20	93039219	KLPN_077_93039219	NG-106	F	25	Intensive Care	Intensive care unit	Sputum	Sputum/ BAL	Cancer	Pneumonia	Klebsiella pneumoniae	ST147	1 gene	blaOXA-48-family	blaOXA-181	>=8	R	>=16	R	>=16	R
121	25/04/2023 15:44	93039628	KLPN_078_93039628	TH-109	F	83	Orthopedics	Surgery	Urine	Urine	Diabetes, Surgical operation	Urinary tract infection	Klebsiella pneumoniae	ST709	1 gene	blaNDM	blaNDM-4	>=8	R	>=16	R	>=16	R
122	01/05/2023 13:26	93041548	KLPN_079_93041548	LB-116	F	83	Orthopedics	Surgery	Urine	Urine	Surgical operation	Urinary tract infection	Klebsiella pneumoniae	ST5815	1 gene	blaKPC	blaKPC-2	>=8	R	>=16	R	>=16	R
123	04/05/2023 04:16	93042027	KLPN_080_93042027	NC-118	M	53	Cardiac Surgery	Surgery	Blood	Blood	Cardiology disease, pneumonia	Bloodstream infection	Klebsiella pneumoniae	ST1	1 gene	blaKPC	blaKPC-2	>=8	R	8	R	>=16	R
124	04/05/2023 21:25	93042546	KLPN_081_93042546	HD-125	M	49	Intensive Care D	Intensive care unit	Sputum	Sputum/ BAL	Surgical operation	Pneumonia	Klebsiella pneumoniae	ST307	1 gene	blaNDM	blaNDM-1	>=8	R	>=16	R	>=16	R
125	04/05/2023 12:00	93042308	KLPN_082_93042308	NQ-121	M	37	Intensive Care	Intensive care unit	Sputum	Sputum/ BAL	Cerebrovascular disease, Cancer, Surgical operation, Others	Pneumonia	Klebsiella pneumoniae	ST147	1 gene	blaOXA-48-family	blaOXA-181	>=8	R	>=16	R	>=16	R
126	04/05/2023 14:58	93042439	KLPN_083_93042439	DT-123	F	20	Haematology	Internal medicine	Pus (wound)	Pus/ Inflammation fluid	Haematology disease	Skin and soft tissue infections	Klebsiella pneumoniae	ST16	2 genes	blaNDM, blaOXA-48-family	blaNDM (No specific gene), blaOXA-181	>=8	R	2	I	>=16	R
127	05/05/2023 14:20	93042871	KLPN_084_93042871	NH-126	M	21	Urology	Surgery	Urine	Urine	Kidney disease	Urinary tract infection	Klebsiella pneumoniae	ST656	3 genes	blaKPC, blaNDM, blaOXA-48-family	blaKPC-2, blaNDM-5, blaOXA-181	>=8	R	>=16	R	>=16	R
128	04/05/2023 11:24	93042247	KLPN_085_93042247	DD-120	M	63	Haematology	Internal medicine	Inflammation fluid (Wound)	Pus/ Inflammation fluid	Cancer	Skin and soft tissue infections	Klebsiella pneumoniae	ST147	1 gene	blaOXA-48-family	blaOXA-181	4	R	2	I	1	S
129	04/05/2023 13:27	93042358	KLPN_086_93042358	BT-122	M	59	Digestive Surgery	Surgery	Sputum	Sputum/ BAL	Cancer	Pneumonia	Klebsiella pneumoniae	ST5815	1 gene	blaKPC	blaKPC-2	>=8	R	>=16	R	>=16	R
130	05/05/2023 16:12	93042930	KLPN_087_93042930	NH-128	M	75	Intensive Care	Intensive care unit	Bile	Pus/ Inflammation fluid	Kidney disease	Skin and soft tissue infections	Klebsiella pneumoniae	ST16	2 genes	blaNDM, blaOXA-48-family	blaNDM-4, blaOXA-181	>=8	R	>=16	R	>=16	R
131	06/05/2023 19:17	93043270	KLPN_088_93043270	LK-131	M	71	Intensive Care	Intensive care unit	Sputum	Sputum/ BAL	Sepic shock	Pneumonia	Klebsiella pneumoniae	ST16	2 genes	blaNDM, blaOXA-48-family	blaNDM-4, blaOXA-181	>=8	R	>=16	R	>=16	R
132	05/05/2023 19:56	93042973	KLPN_089_93042973	NV-129	F	48	Nephrology	Internal medicine	Urine	Urine	Cardiology disease, Kidney disease	Urinary tract infection	Klebsiella pneumoniae	ST16	1 gene	blaOXA-48-family	blaOXA-48	>=8	R	4	R	>=16	R
133	07/05/2023 10:22	93043394	KLPN_090_93043394	NT-132	M	44	Intensive Care D	Intensive care unit	Blood	Blood	Kidney disease	Bloodstream infection	Klebsiella pneumoniae	ST16	1 gene	blaOXA-48-family	blaOXA-48	>=8	R	8	R	>=16	R
134	08/05/2023 07:43	93043631	KLPN_091_93043631	TH-133	F	60	Interventional Cardiology	Internal medicine	Blood	Blood	Cardiology disease	Bloodstream infection	Klebsiella pneumoniae	No ST predicted	1 gene	blaNDM	blaNDM-4	>=8	R	>=16	R	>=16	R
135	08/05/2023 13:54	93043857	KLPN_092_93043857	VT-134	F	38	Burn - Plastic Surgery	Surgery	Blood	Blood	Severe Burn	Bloodstream infection	Klebsiella pneumoniae	ST147	1 gene	blaNDM	blaNDM-4	>=8	R	>=16	R	>=16	R
136	10/05/2023 04:42	93044613	KLPN_093_93044613	NH-139	M	74	Intensive Care D	Intensive care unit	Sputum	Sputum/ BAL	Surgical operation	Pneumonia	Klebsiella pneumoniae	ST16	2 genes	blaNDM, blaOXA-48-family	blaNDM-4, blaOXA-181	>=8	R	>=16	R	>=16	R
137	09/05/2023 21:10	93044555	KLPN_094_93044555	TT-138	M	75	Palliative Care	Internal medicine	Urine	Urine	Cancer	Urinary tract infection	Klebsiella pneumoniae	ST16	2 genes	blaNDM, blaOXA-48-family	blaNDM-4, blaOXA-181	>=8	R	>=16	R	>=16	R
138	14/05/2023 07:05	93046126	KLPN_095_93046126	TD-142	M	56	Urology	Surgery	Urine	Urine	Surgical operation	Urinary tract infection	Klebsiella pneumoniae	ST16	1 gene	blaNDM	blaNDM-4	>=8	R	>=16	R	>=16	R
139	15/05/2023 10:42	93046463	KLPN_096_93046463	NT-143	M	82	Urology	Surgery	Urine	Urine	Kidney disease	Urinary tract infection	Klebsiella pneumoniae	ST16	1 gene	blaOXA-48-family	blaOXA-181	>=8	R	>=16	R	>=16	R
140	15/05/2023 11:13	93046503	KLPN_097_93046503	PN-144	F	44	Neurosurgery Intensive Care	Intensive care unit	Blood	Blood	Surgical operation	Bloodstream infection	Klebsiella pneumoniae	ST16	2 genes	blaNDM, blaOXA-48-family	blaNDM-4, blaOXA-181	>=8	R	>=16	R	>=16	R
141	15/05/2023 14:47	93046663	KLPN_098_93046663	TL-145	F	66	Urology	Surgery	Urine	Urine	Kidney disease	Urinary tract infection	Klebsiella pneumoniae	ST656	1 gene	blaOXA-48-family	blaOXA-181	>=8	R	8	R	>=16	R
142	15/05/2023 15:07	93046681	KLPN_099_93046681	NH-146	M	19	Intensive Care	Intensive care unit	Sputum	Sputum/ BAL	Sepic shock, Haematology disease, Others	Pneumonia	Klebsiella pneumoniae	ST147	1 gene	blaOXA-48-family	blaOXA-181	>=8	R	>=16	R	>=16	R
143	16/05/2023 09:55	93046964	KLPN_100_93046964	NT-147	M	37	Intensive Care	Intensive care unit	Blood	Blood	Kidney disease, Others	Bloodstream infection	Klebsiella pneumoniae	ST16	2 genes	blaNDM, blaOXA-48-family	blaNDM-4, blaOXA-181	>=8	R	>=16	R	>=16	R
144	17/05/2023 11:39	93047543	KLPN_101_93047543	NT-149	F	62	Intensive Care	Intensive care unit	Urine	Urine	No information	Urinary tract infection	Klebsiella pneumoniae	ST11	1 gene	blaNDM	blaNDM-4	>=8	R	>=16	R	>=16	R
145	04/05/2023 16:39	93042491	KLPN_102_93042491	PT-124	M	63	General Internal Medicine 9B1	Internal medicine	Urine	Urine	Cancer	Urinary tract infection	Klebsiella pneumoniae	ST5815	2 genes	blaKPC, blaOXA-48-family	blaKPC-2, blaOXA-181	>=8	R	>=16	R	>=16	R
146	05/05/2023 15:02	93042886	KLPN_103_93042886	LM-127	M	60	Cardiology	Internal medicine	Urine	Urine	Cardiology disease	Urinary tract infection	Klebsiella pneumoniae	ST16	2 genes	blaNDM, blaOXA-48-family	blaNDM-4, blaOXA-181	>=8	R	>=16	R	>=16	R
147	09/05/2023 15:59	93044509	KLPN_104_93044509	PH-137	M	23	Hepatobiliary and Pancreas Surgery	Surgery	Urine	Urine	Surgical operation	Urinary tract infection	Klebsiella pneumoniae	ST11	1 gene	blaNDM	blaNDM-4	>=8	R	>=16	R	>=16	R
148	09/05/2023 10:47	93044250	KLPN_105_93044250	NH-135	F	91	Intensive Care D	Intensive care unit	Sputum	Sputum/ BAL	No information	Pneumonia	Klebsiella pneumoniae	ST16	2 genes	blaNDM, blaOXA-48-family	blaNDM-4, blaOXA-48	>=8	R	>=16	R	>=16	R
149	18/05/2023 13:48	93048000	KLPN_106_93048000	KP-153	F	72	Intensive Care	Intensive care unit	Catheter	Pus/ Inflammation fluid	Sepic shock, Diabetes, Others	Catheter	Klebsiella pneumoniae	ST5815	1 gene	blaKPC	blaKPC-2	>=8	R	>=16	R	>=16	R
150	18/05/2023 13:33	93047974	KLPN_107_93047974	LT-151	M	65	Urology	Surgery	Urine	Urine	No information	Urinary tract infection	Klebsiella pneumoniae	ST15	1 gene	blaNDM	blaNDM-4	>=8	R	>=16	R	>=16	R
151	18/05/2023 10:42	93047874	KLPN_108_93047874	PD-150	M	45	Hepatobiliary and Pancreas Surgery	Surgery	Blood	Blood	Biliary tract disease	Bloodstream infection	Klebsiella pneumoniae	ST4	1 gene	blaNDM	blaNDM-4	>=8	R	>=16	R	8	R
152	18/05/2023 13:38	93047985	KLPN_109_93047985	FD-152	F	46	Intensive Care	Intensive care unit	Sputum	Sputum/ BAL	No information	Pneumonia	Klebsiella pneumoniae	ST147	1 gene	blaOXA-48-family	blaOXA-181	>=8	R	>=16	R	>=16	R
153	20/05/2023 10:17	93048775	KLPN_110_93048775	BP-154	M	67	Intensive Care	Intensive care unit	Blood	Blood	Sepic shock, Surgical operation, Kidney disease	Bloodstream infection	Klebsiella pneumoniae	ST16	2 genes	blaNDM, blaOXA-48-family	blaNDM-4, blaOXA-181	>=8	R	>=16	R	>=16	R
154	20/05/2023 19:03	93048883	KLPN_111_93048883	NQ-155	M	36	Intensive Care	Intensive care unit	Blood	Blood	Severe Burn, Sepic shock, Surgical operation	Bloodstream infection	Klebsiella pneumoniae	ST16	2 genes	blaNDM, blaOXA-48-family	blaNDM-4, blaOXA-181	>=8	R	>=16	R	>=16	R
155	22/05/2023 10:57	93049288	KLPN_112_93049288	PD-156	F	37	Lung	Internal medicine	Urine	Urine	No information	Urinary tract infection	Klebsiella pneumoniae	ST273	1 gene	blaOXA-48-family	blaOXA-181	>=8	R	4	R	>=16	R
156	04/05/2023 10:10	93042202	KLPN_113_93042202	BN-119	F	44	Burn - Plastic Surgery	Surgery	Blood	Blood	Severe Burn	Bloodstream infection	Klebsiella pneumoniae	ST16	2 genes	blaNDM, blaOXA-48-family	blaNDM-4, blaOXA-48	>=8	R	>=16	R	>=16	R
157	24/05/2023 21:21	93050705	KLPN_114_93050705	LH-158	F	89	Intensive Care	Intensive care unit	Blood	Blood	Cerebrovascular disease, Cardiology disease, Diabetes, Kidney disease	Bloodstream infection	Klebsiella pneumoniae	ST147	1 gene	blaOXA-48-family	blaOXA-181	>=8	R	>=16	R	>=16	R
158	28/05/2023 19:13	93052119	KLPN_115_93052119	NS-160	M	70	Hepatobiliary and Pancreas Surgery	Surgery	Blood	Blood	Cancer	Bloodstream infection	Klebsiella pneumoniae	ST16	1 gene	blaOXA-48-family	blaOXA-48	>=8	R	>=16	R	>=16	R
159	29/05/2023 12:42	93052396	KLPN_116_93052396	NC-162	F	61	Intensive Care D	Intensive care unit	Pus (wound)	Pus/ Inflammation fluid	Kidney transplantation, Surgical operation	Skin and soft tissue infections	Klebsiella pneumoniae	ST16	1 gene	blaOXA-48-family	blaOXA-48	>=8	R	>=16	R	>=16	R
160	29/05/2023 11:34	93052371	KLPN_117_93052371	TD-161	M	19	Intensive Care	Intensive care unit	Blood	Blood	Sepic shock, Surgical operation	Bloodstream infection	Klebsiella pneumoniae	ST656	3 genes	blaKPC, blaNDM, blaOXA-48-family	blaKPC-2, blaNDM-5, blaOXA-181	>=8	R	>=16	R	>=16	R
161	30/05/2023 12:59	93052926	KLPN_118_93052926	TK-164	F	64	Intensive Care	Intensive care unit	Sputum	Sputum/ BAL	Sepic shock, Kidney disease, Others	Pneumonia	Klebsiella pneumoniae	ST656	3 genes	blaKPC, blaNDM, blaOXA-48-family	blaKPC-2, blaNDM-5, blaOXA-181	>=8	R	>=16	R	>=16	R
162	04/06/2023 06:49	93054955	KLPN_119_93054955	PS-166	M	71	Intensive Care D	Intensive care unit	Sputum	Sputum/ BAL	Cardiology disease	Pneumonia	Klebsiella pneumoniae	ST16	1 gene	blaOXA-48-family	blaOXA-181	>=8	R	2	I	>=16	R
163	04/06/2023 14:27	93055040	KLPN_120_93055040	TH-167	F	45	Burn - Plastic Surgery	Surgery	Blood	Blood	Severe Burn	Bloodstream infection	Klebsiella pneumoniae	ST16	2 genes	blaNDM, blaOXA-48-family	blaNDM-4, blaOXA-48	>=8	R	>=16	R	>=16	R
164	07/06/2023 13:57	93056470	KLPN_121_93056470	LH-171	M	60	Neurosurgery	Surgery	Sputum	Sputum/ BAL	Cerebrovascular disease	Pneumonia	Klebsiella pneumoniae	ST656	2 genes	blaNDM, blaOXA-48-family	blaNDM-4, blaOXA-181	>=8	R	>=16	R	>=16	R
165	10/06/2023 04:28	93057723	KLPN_122_93057723	LC-173	F	63	Intensive Care D	Intensive care unit	Abdominal fluid	Pus/ Inflammation fluid	No information	Abdominal infection	Klebsiella pneumoniae	ST656	3 genes	blaKPC, blaNDM, blaOXA-48-family	blaKPC-2, blaNDM-5, blaOXA-181	>=8	R	>=16	R	>=16	R
166	12/06/2023 21:56	93058570	KLPN_123_93058570	NL-174	F	72	Head Injury	Surgery	Sputum	Sputum/ BAL	Cerebrovascular disease	Pneumonia	Klebsiella pneumoniae	ST5815	1 gene	blaKPC	blaKPC-2	>=8	R	>=16	R	>=16	R
167	13/06/2023 14:01	93058930	KLPN_124_93058930	ND-175	M	82	Neurosurgery	Surgery	Sputum	Sputum/ BAL	Cerebrovascular disease	Pneumonia	Klebsiella pneumoniae	ST5815	1 gene	blaKPC	blaKPC-2	>=8	R	>=16	R	>=16	R
168	14/06/2023 12:08	93059349	KLPN_125_93059349	NH-176	F	91	Intensive Care D	Intensive care unit	Urine	Urine	Diabetes, Others	Urinary tract infection	Klebsiella pneumoniae	ST11	1 gene	blaKPC	blaKPC-2	>=8	R	>=16	R	>=16	R
169	15/06/2023 13:45	93059958	KLPN_126_93059958	NA-178	M	53	Intensive Care D	Intensive care unit	Urine	Urine	Sepic shock	Urinary tract infection	Klebsiella pneumoniae	ST16	2 genes	blaNDM, blaOXA-48-family	blaNDM-4, blaOXA-48	>=8	R	>=16	R	>=16	R
170	21/06/2023 10:23	93062326	KLPN_127_93062326	NC-182	M	85	Intensive Care	Intensive care unit	Pus (wound)	Pus/ Inflammation fluid	Sepic shock	Skin and soft tissue infections	Klebsiella pneumoniae	No ST predicted	1 gene	blaNDM	blaNDM-4	>=8	R	>=16	R	>=16	R
171	22/06/2023 11:12	93062961	KLPN_128_93062961	NH-183	M	39	Intensive Care	Intensive care unit	Blood	Blood	Sepic shock, Liver disease	Bloodstream infection	Klebsiella pneumoniae	ST11	1 gene	blaKPC	blaKPC-2	>=8	R	>=16	R	>=16	R
172	26/06/2023 17:39	93064685	KLPN_129_93064685	PB-184	M	55	Neurosurgery	Surgery	Sputum	Sputum/ BAL	Cerebrovascular disease	Pneumonia	Klebsiella pneumoniae	ST5815	1 gene	blaKPC	blaKPC-2	>=8	R	>=16	R	>=16	R
173	28/06/2023 10:47	93065447	KLPN_130_93065447	VA-185	F	57	Neurosurgery	Surgery	Sputum	Sputum/ BAL	Cerebrovascular disease	Pneumonia	Klebsiella pneumoniae	ST5815	1 gene	blaKPC	blaKPC-2	>=8	R	>=16	R	>=16	R
174	28/06/2023 13:40	93065602	KLPN_131_93065602	VK-186	F	31	Otorhinolaryngology	Surgery	Blood	Blood	No information	Bloodstream infection	Klebsiella pneumoniae	ST16	1 gene	blaNDM	blaNDM-4	>=8	R	>=16	R	>=16	R
175	13/07/2023 23:57	93072370	KLPN_132_93072370	LB-191	M	59	Head Injury	Surgery	Sputum	Sputum/ BAL	Cerebrovascular disease	Pneumonia	Klebsiella pneumoniae	ST5815	1 gene	blaKPC	blaKPC-2	>=8	R	>=16	R	>=16	R
176	22/07/2023 06:46	93075962	KLPN_133_93075962	NT-193	M	64	Hepatobiliary and Pancreas Surgery	Surgery	Sputum	Sputum/ BAL	Kidney disease	Pneumonia	Klebsiella pneumoniae	ST16	1 gene	blaOXA-48-family	blaOXA-181	>=8	R	4	R	>=16	R
177	22/07/2023 07:08	93075964	KLPN_134_93075964	RH-194	M	43	Neurosurgery Intensive Care	Intensive care unit	Urine	Urine	Cerebrovascular disease	Urinary tract infection	Klebsiella pneumoniae	ST16	2 genes	blaNDM, blaOXA-48-family	blaNDM-4, blaOXA-181	>=8	R	>=16	R	>=16	R
178	31/07/2023 18:44	93080257	KLPN_135_93080257	VN-197	F	77	Intensive Care	Intensive care unit	Blood	Blood	Sepic shock, Surgical operation	Bloodstream infection	Klebsiella pneumoniae	ST16	2 genes	blaNDM, blaOXA-48-family	blaNDM-4, blaOXA-181	>=8	R	>=16	R	>=16	R
179	30/03/2023 13:07	93028447	KLPN_136_93028447	NT-041	M	65	Intensive Care	Intensive care unit	Blood	Blood	Diabetes, Kidney disease, Others	Bloodstream infection	Klebsiella pneumoniae	ST11	1 gene	blaNDM	blaNDM-4	>=8	R	>=16	R	>=16	R
180	17/04/2023 15:09	93036051	KLPN_137_93036051	VU-088	F	65	Gastroenterology	Internal medicine	Urine	Urine	No information	Urinary tract infection	Klebsiella pneumoniae	ST16	2 genes	blaNDM, blaOXA-48-family	blaNDM-4, blaOXA-181	>=8	R	>=16	R	>=16	R
181	27/03/2023 10:25	93026726	KLPN_138_93026726	LT-033	M	63	Intensive Care	Intensive care unit	Pus (wound)	Pus/ Inflammation fluid	Cardiology disease, Sepic shock, Kidney disease	Skin and soft tissue infections	Klebsiella pneumoniae	ST5815	1 gene	blaKPC	blaKPC-2	>=8	R	>=16	R	>=16	R
182	08/08/2023 13:04	93084149	KLPN_139_93084149	PB-198	M	59	Neurosurgery	Surgery	Sputum	Sputum/ BAL	Cerebrovascular disease	Pneumonia	Klebsiella pneumoniae	ST378	2 genes	blaNDM, blaOXA-48-family	blaNDM-4, blaOXA-48	>=8	R	>=16	R	>=16	R
183	09/08/2023 11:50	93084714	KLPN_140_93084714	HH-200	M	46	Intensive Care	Intensive care unit	Drainage fluid (Abdomen)	Pus/ Inflammation fluid	Biliary tract disease, Kidney disease, Others	Abdominal infection	Klebsiella pneumoniae	ST16	2 genes	blaNDM, blaOXA-48-family	blaNDM-4, blaOXA-181	>=8	R	>=16	R	>=16	R
184	08/08/2023 22:11	93084430	KLPN_141_93084430	ND-199	M	61	Intensive Care	Intensive care unit	Pus (wound)	Pus/ Inflammation fluid	Sepic shock, Diabetes, Surgical operation, Liver disease	Skin and soft tissue infections	Klebsiella pneumoniae	ST16	1 gene	blaOXA-48-family	blaOXA-181	>=8	R	8	R	>=16	R
185	14/08/2023 13:23	93087172	KLPN_142_93087172	TT-201	F	40	Neurosurgery	Surgery	Blood	Blood	Surgical operation	Bloodstream infection	Klebsiella pneumoniae	ST15	1 gene	blaNDM	blaNDM-4	>=8	R	>=16	R	>=16	R
186	16/08/2023 18:52	93088530	KLPN_143_93088530	NS-203	M	92	Intensive Care	Intensive care unit	Blood	Blood	Cardiology disease, Sepic shock, Surgical operation	Bloodstream infection	Klebsiella pneumoniae	ST5815	1 gene	blaKPC	blaKPC-2	>=8	R	>=16	R	>=16	R
187	06/07/2023 13:01	93069139	KLPN_144_93069139	LN-187	F	91	Hepatobiliary and Pancreas Surgery	Surgery	Sputum	Sputum/ BAL	Surgical operation, Kidney disease	Pneumonia	Klebsiella pneumoniae	ST16	2 genes	blaNDM, blaOXA-48-family	blaNDM-4, blaOXA-181	>=8	R	>=16	R	>=16	R
188	07/07/2023 10:02	93069496	KLPN_145_93069496	NC-188	M	73	Neurosurgery	Surgery	Sputum	Sputum/ BAL	Surgical operation	Pneumonia	Klebsiella pneumoniae	ST378	2 genes	blaNDM, blaOXA-48-family	blaNDM-4, blaOXA-48	>=8	R	>=16	R	>=16	R
189	09/07/2023 13:41	93070193	KLPN_146_93070193	HN-189	F	94	Intensive Care D	Intensive care unit	Urine	Urine	Cardiology disease	Urinary tract infection	Klebsiella pneumoniae	ST16	1 gene	blaOXA-48-family	blaOXA-181	>=8	R	4	R	>=16	R
190	11/07/2023 16:03	93071255	KLPN_147_93071255	NK-190	M	18	Neurosurgery Intensive Care	Intensive care unit	Urine	Urine	Cerebrovascular disease, Surgical operation	Urinary tract infection	Klebsiella pneumoniae	ST29	1 gene	blaNDM	blaNDM-4	>=8	R	>=16	R	>=16	R
191	16/08/2023 12:54	93088334	KLPN_148_93088334	PN-202	F	55	Intensive Care D	Intensive care unit	Pleural fluid	Pus/ Inflammation fluid	Cancer	Chest infection	Klebsiella pneumoniae	ST147	1 gene	blaNDM	blaNDM-4	>=8	R	>=16	R	>=16	R
192	23/08/2023 10:29	93091445	KLPN_149_93091445	TH-205	M	55	Intensive Care D	Intensive care unit	Blood	Blood	Diabetes, Kidney disease, Others	Bloodstream infection	Klebsiella pneumoniae	ST16	2 genes	blaNDM, blaOXA-48-family	blaNDM-4, blaOXA-181	>=8	R	>=16	R	>=16	R
193	15/06/2023 13:07	93059933	KLPN_150_93059933	NY-177	F	79	Intensive Care	Intensive care unit	Catheter	Pus/ Inflammation fluid	Cardiology disease, Diabetes, Kidney disease	Catheter	Klebsiella pneumoniae	ST656	3 genes	blaKPC, blaNDM, blaOXA-48-family	blaKPC-2, blaNDM-5, blaOXA-181	>=8	R	>=16	R	>=16	R
194	17/06/2023 10:31	93060771	KLPN_151_93060771	PN-179	M	52	Intensive Care	Intensive care unit	Blood	Blood	Kidney disease, Others	Bloodstream infection	Klebsiella pneumoniae	ST147	1 gene	blaOXA-48-family	blaOXA-181	>=8	R	>=16	R	>=16	R
195	17/06/2023 13:35	93060806	KLPN_152_93060806	TS-180	M	59	Intensive Care	Intensive care unit	Pus (wound)	Pus/ Inflammation fluid	Cancer, Sepic shock, Surgical operation, Kidney disease	Skin and soft tissue infections	Klebsiella pneumoniae	ST2668	1 gene	blaOXA-48-family	blaOXA-181	>=8	R	>=16	R	>=16	R
